# Supplementary material for: Bulk and single-cell transcriptome profiling reveal necroptosis-based molecular classification, tumor microenvironment infiltration characterization, and prognosis prediction in colorectal cancer
Source: J Transl Med. 2022 May 19;20:235. doi: 10.1186/s12967-022-03431-6 (PMC9118791; doi:10.1186/s12967-022-03431-6)
Supplement: Supplementary file 10 — Additional file 10. Supplementary Table S1. The description of patients with bulk RNA expression data, including clinical characteristics and consensus clusters. [file 12967_2022_3431_MOESM10_ESM.xls]

## Sheet: TCGA
Table S1. Basic information of bulk databases (TCGA, GSE33133, GSE14333, GSE39582 and GSE37892)
samples	CMS	MSI	lymphatic_invasion	tumor_stage.diagnoses	Dead	consensus cluster	gene cluster		OS	OS.time
TCGA-F4-6460-01	CMS4	MSS	NO	stage III	Alive	NRC1	gene cluster A		1	972
TCGA-AA-A01C-01	CMS2	MSS	YES	stage III	Dead	NRC1	gene cluster A		0	457
TCGA-AA-3715-01	CMS1	MSI-H	YES	stage II	Alive	NRC1	gene cluster A		1	579
TCGA-AA-3968-01	CMS2	MSS	NO	stage I	Alive	NRC1	gene cluster B		0	669
TCGA-A6-2671-01	CMS4	MSS	YES	stage IV	Alive	NRC1	gene cluster A		1	1331
TCGA-AA-3858-01	CMS2	MSS	YES	stage I	Alive	NRC1	gene cluster B		0	945
TCGA-A6-2685-01	CMS4	MSS	NO	stage II	Alive	NRC1	gene cluster A		0	1133
TCGA-AA-A02O-01	CMS3	MSS	YES	stage II	Alive	NRC1	gene cluster A		0	28
TCGA-AA-A00F-01	CMS2	MSS	YES	stage III	Dead	NRC1	gene cluster A		0	1035
TCGA-AA-3860-01	CMS4	MSS	YES	stage III	Alive	NRC1	gene cluster B		0	945
TCGA-NH-A50U-01	CMS2	unknown	NO	stage IV	Dead	NRC1	gene cluster B		1	334
TCGA-F4-6809-01	CMS4	MSS	NO	stage IV	Alive	NRC1	gene cluster B		1	403
TCGA-AA-3975-01	CMS2	MSS	NO	stage I	Alive	NRC1	gene cluster A		0	1036
TCGA-AA-3548-01	CMS2	MSS	YES	stage III	Alive	NRC1	gene cluster A		0	1034
TCGA-A6-2681-01	CMS4	MSS	NO	stage II	Alive	NRC1	gene cluster A		0	1387
TCGA-AA-A01R-01	CMS1	MSI-H	YES	stage III	Alive	NRC1	gene cluster A		0	1065
TCGA-AA-3989-01	CMS2	MSS	YES	stage IV	Alive	NRC1	gene cluster B		1	242
TCGA-AA-3812-01	CMS4	MSS	YES	stage II	Alive	NRC1	gene cluster A		0	1066
TCGA-AD-6901-01	CMS4	MSI-L	NO	unknown	Dead	NRC1	gene cluster A		1	682
TCGA-CM-5344-01	CMS4	MSS	YES	stage III	Alive	NRC1	gene cluster B		0	670
TCGA-AA-3856-01	CMS2	MSS	YES	stage II	Alive	NRC1	gene cluster B		0	30
TCGA-AA-A01X-01	CMS2	MSS	YES	stage III	Dead	NRC1	gene cluster A		0	791
TCGA-RU-A8FL-01	CMS2	MSS	unknown	stage III	Dead	NRC1	gene cluster B		0	1177
TCGA-CM-4746-01	CMS3	MSI-H	NO	stage I	Alive	NRC1	gene cluster B		0	1126
TCGA-AA-3538-01	CMS2	MSS	NO	stage I	Alive	NRC1	gene cluster B		0	791
TCGA-CM-4750-01	CMS2	MSI-L	YES	stage III	Alive	NRC1	gene cluster A		0	244
TCGA-D5-6932-01	CMS4	MSS	NO	stage II	Alive	NRC1	gene cluster B		0	346
TCGA-DM-A1DB-01	CMS2	MSS	NO	stage II	Alive	NRC1	gene cluster A		1	1348
TCGA-AA-3688-01	CMS2	MSI-L	YES	stage IV	Alive	NRC1	gene cluster B		0	578
TCGA-AA-A017-01	CMS2	MSS	YES	stage II	Alive	NRC1	gene cluster A		0	457
TCGA-AZ-4684-01	CMS2	MSI-L	YES	stage IV	Alive	NRC1	gene cluster B		0	1977
TCGA-AA-A02H-01	CMS2	unknown	YES	stage IV	Alive	NRC1	gene cluster A		1	61
TCGA-CM-6676-01	CMS2	MSI-L	YES	stage I	Alive	NRC1	gene cluster B		0	337
TCGA-AA-3506-01	CMS3	MSS	unknown	stage I	Alive	NRC1	gene cluster A		0	1765
TCGA-AA-A00O-01	CMS4	MSI-L	YES	stage III	Alive	NRC1	gene cluster A		0	822
TCGA-AA-3494-01	CMS2	MSS	unknown	stage IV	Alive	NRC1	gene cluster B		0	31
TCGA-D5-6929-01	CMS4	MSI-L	YES	stage IV	Alive	NRC1	gene cluster B		0	408
TCGA-A6-2679-01	CMS3	MSS	NO	stage II	Alive	NRC1	gene cluster A		0	1366
TCGA-AA-A02E-01	CMS2	unknown	YES	stage IV	Alive	NRC1	gene cluster A		1	90
TCGA-AA-3662-01	CMS2	MSS	NO	stage IV	Alive	NRC1	gene cluster B		0	184
TCGA-AY-4070-01	CMS2	unknown	YES	stage III	Alive	NRC1	gene cluster A		1	496
TCGA-AA-A00Q-01	CMS2	MSS	YES	stage III	Alive	NRC1	gene cluster B		0	1278
TCGA-AA-A01F-01	CMS2	MSS	YES	stage III	Alive	NRC1	gene cluster B		0	974
TCGA-AA-3841-01	CMS2	MSS	YES	stage II	Dead	NRC1	gene cluster A		0	1124
TCGA-AZ-6608-01	CMS2	unknown	YES	stage III	Dead	NRC1	gene cluster B		1	59
TCGA-CM-4747-01	CMS2	MSI-L	YES	stage IV	Dead	NRC1	gene cluster A		0	761
TCGA-AA-3514-01	CMS4	MSS	NO	stage I	Dead	NRC1	gene cluster A		0	31
TCGA-D5-6922-01	CMS4	MSS	YES	stage III	Alive	NRC1	gene cluster B		0	308
TCGA-D5-6536-01	CMS4	MSS	NO	stage II	Dead	NRC1	gene cluster B		0	543
TCGA-AA-3952-01	CMS4	unknown	YES	stage III	Alive	NRC1	gene cluster B		1	61
TCGA-AA-A01Z-01	CMS2	MSS	YES	stage II	Alive	NRC1	gene cluster A		0	1126
TCGA-AA-A02J-01	CMS2	unknown	YES	stage IV	Alive	NRC1	gene cluster A		1	153
TCGA-AA-A01T-01	CMS3	MSS	YES	stage III	Alive	NRC1	gene cluster A		0	1005
TCGA-CM-6679-01	CMS4	MSS	NO	stage II	Alive	NRC1	gene cluster B		0	306
TCGA-AA-A03J-01	CMS2	MSS	unknown	stage I	Alive	NRC1	gene cluster A		0	1246
TCGA-AA-3488-01	CMS2	unknown	unknown	stage IV	Alive	NRC1	gene cluster A		1	153
TCGA-AA-A02K-01	CMS2	MSS	YES	stage IV	Alive	NRC1	gene cluster A		1	426
TCGA-DM-A28A-01	CMS2	MSS	NO	stage III	Alive	NRC1	gene cluster B		1	805
TCGA-AA-A01K-01	CMS4	MSS	YES	stage III	Dead	NRC1	gene cluster B		0	943
TCGA-A6-2683-01	CMS3	MSI-L	NO	stage IV	Dead	NRC1	gene cluster A		1	504
TCGA-AA-A01S-01	CMS2	MSI-L	unknown	stage III	Alive	NRC1	gene cluster A		0	31
TCGA-AA-3971-01	CMS2	MSS	NO	stage III	Dead	NRC1	gene cluster B		0	489
TCGA-AA-3667-01	CMS2	MSI-L	NO	stage I	Alive	NRC1	gene cluster A		0	426
TCGA-AA-3549-01	CMS2	MSS	NO	stage I	Alive	NRC1	gene cluster B		0	639
TCGA-G4-6307-01	CMS2	MSS	YES	stage III	Dead	NRC1	gene cluster A		0	1674
TCGA-D5-6923-01	CMS4	MSS	NO	stage I	Alive	NRC1	gene cluster B		0	378
TCGA-SS-A7HO-01	CMS2	MSS	YES	stage II	Alive	NRC1	gene cluster B		0	1829
TCGA-AZ-4614-01	CMS1	unknown	YES	stage IV	Alive	NRC1	gene cluster A		1	172
TCGA-AA-3553-01	CMS2	MSI-L	NO	stage I	Alive	NRC1	gene cluster B		0	730
TCGA-AA-3867-01	CMS4	MSS	YES	stage IV	Alive	NRC1	gene cluster B		0	731
TCGA-DM-A28F-01	CMS2	MSS	unknown	stage III	Alive	NRC1	gene cluster B		1	1094
TCGA-NH-A8F8-01	CMS4	MSS	YES	stage IV	Alive	NRC1	gene cluster A		1	511
TCGA-AA-3496-01	CMS4	MSI-L	unknown	stage II	Alive	NRC1	gene cluster B		0	31
TCGA-F4-6459-01	CMS4	MSS	NO	stage III	Alive	NRC1	gene cluster B		1	262
TCGA-AY-4071-01	CMS2	unknown	NO	stage I	Alive	NRC1	gene cluster A		1	29
TCGA-AA-3542-01	CMS2	MSS	YES	stage III	Alive	NRC1	gene cluster A		0	395
TCGA-AA-3531-01	CMS2	MSI-L	NO	stage II	Alive	NRC1	gene cluster A		0	1035
TCGA-AA-3562-01	CMS2	MSS	YES	stage III	Alive	NRC1	gene cluster B		0	608
TCGA-D5-6926-01	CMS4	MSS	NO	stage III	Dead	NRC1	gene cluster B		0	275
TCGA-AA-3848-01	CMS2	MSS	YES	stage III	Alive	NRC1	gene cluster A		1	306
TCGA-NH-A6GC-01	CMS1	MSS	NO	stage IV	Alive	NRC1	gene cluster A		0	389
TCGA-AA-A02W-01	CMS2	MSI-L	unknown	stage I	Alive	NRC1	gene cluster B		0	1247
TCGA-A6-2680-01	CMS2	MSS	NO	stage II	Alive	NRC1	gene cluster A		0	1068
TCGA-AA-3692-01	CMS3	MSI-L	NO	stage IV	Alive	NRC1	gene cluster C		1	1095
TCGA-AA-3552-01	CMS2	MSS	YES	stage III	Alive	NRC1	gene cluster A		1	396
TCGA-AA-3679-01	CMS2	MSS	YES	stage IV	Alive	NRC1	gene cluster B		0	457
TCGA-QG-A5Z1-01	CMS4	MSI-L	YES	stage III	Alive	NRC1	gene cluster B		1	256
TCGA-CM-4748-01	CMS2	MSS	YES	stage III	Alive	NRC1	gene cluster B		0	792
TCGA-AA-A004-01	CMS3	MSI-L	NO	stage II	Dead	NRC1	gene cluster A		0	424
TCGA-G4-6295-01	CMS2	MSI-L	NO	stage II	Dead	NRC1	gene cluster B		0	254
TCGA-AA-3544-01	CMS2	MSS	NO	stage I	Alive	NRC1	gene cluster B		0	426
TCGA-CM-4752-01	CMS2	MSS	NO	stage II	Alive	NRC1	gene cluster B		0	396
TCGA-AA-A00L-01	CMS2	MSS	NO	stage II	Alive	NRC1	gene cluster B		0	1157
TCGA-AZ-6603-01	CMS4	unknown	NO	unknown	Dead	NRC1	gene cluster B		1	899
TCGA-A6-A56B-01	CMS4	MSS	YES	stage III	Alive	NRC1	gene cluster B		1	1711
TCGA-AG-A00H-01	CMS4	MSS	NO	unknown	Alive	NRC1	gene cluster A		0	790
TCGA-AG-A025-01	CMS2	MSS	unknown	unknown	Alive	NRC1	gene cluster A		0	1520
TCGA-F5-6863-01	CMS4	MSI-L	NO	unknown	Alive	NRC1	gene cluster A		1	361
TCGA-AG-3896-01	CMS2	MSS	YES	unknown	Dead	NRC1	gene cluster B		0	31
TCGA-AG-3593-01	CMS2	MSS	NO	unknown	Alive	NRC1	gene cluster B		0	1035
TCGA-AG-A02X-01	CMS3	MSS	YES	unknown	Alive	NRC1	gene cluster B		0	1247
TCGA-AG-3584-01	CMS3	MSS	YES	unknown	Alive	NRC1	gene cluster A		1	730
TCGA-AG-4008-01	CMS4	MSS	YES	unknown	Dead	NRC1	gene cluster B		0	518
TCGA-AG-4007-01	CMS2	MSI-L	YES	unknown	Alive	NRC1	gene cluster B		0	31
TCGA-AG-3882-01	CMS2	MSS	YES	unknown	Alive	NRC1	gene cluster A		0	608
TCGA-AF-3913-01	CMS4	unknown	YES	unknown	Alive	NRC1	gene cluster B		1	316
TCGA-AG-3881-01	CMS4	MSS	YES	unknown	Alive	NRC1	gene cluster A		0	579
TCGA-AG-3609-01	CMS4	MSS	YES	unknown	Alive	NRC1	gene cluster B		0	608
TCGA-AG-A032-01	CMS2	MSS	YES	unknown	Alive	NRC1	gene cluster A		0	1157
TCGA-AG-3727-01	CMS2	MSS	YES	unknown	Dead	NRC1	gene cluster A		0	30
TCGA-AG-3878-01	CMS4	MSS	NO	unknown	Alive	NRC1	gene cluster A		0	30
TCGA-AG-3893-01	CMS4	MSS	YES	unknown	Alive	NRC1	gene cluster B		0	1065
TCGA-AG-A014-01	CMS2	MSS	NO	unknown	Alive	NRC1	gene cluster A		0	485
TCGA-AG-3999-01	CMS2	MSS	YES	unknown	Alive	NRC1	gene cluster A		0	853
TCGA-AG-3608-01	CMS2	Indeterminate	NO	unknown	Alive	NRC1	gene cluster B		0	485
TCGA-AG-3894-01	CMS2	MSS	YES	unknown	Alive	NRC1	gene cluster B		0	426
TCGA-AG-3885-01	CMS3	MSS	YES	unknown	Dead	NRC1	gene cluster A		0	546
TCGA-AG-3726-01	CMS2	MSS	NO	unknown	Dead	NRC1	gene cluster A		0	243
TCGA-DY-A1DD-01	CMS2	MSI-L	unknown	unknown	Alive	NRC1	gene cluster A		1	1741
TCGA-AG-A026-01	CMS2	unknown	YES	unknown	Alive	NRC1	gene cluster A		1	59
TCGA-AG-3586-01	CMS3	MSS	YES	unknown	Alive	NRC1	gene cluster B		0	31
TCGA-DY-A1DF-01	CMS1	MSI-L	unknown	unknown	Alive	NRC1	gene cluster A		1	734
TCGA-AG-A01J-01	CMS3	MSS	NO	unknown	Alive	NRC1	gene cluster A		0	31
TCGA-AG-4001-01	CMS4	MSI-L	NO	unknown	Alive	NRC1	gene cluster A		0	1096
TCGA-AG-3587-01	CMS2	MSS	NO	unknown	Alive	NRC1	gene cluster A		0	1400
TCGA-AG-A01N-01	CMS2	MSS	YES	unknown	Alive	NRC1	gene cluster A		0	943
TCGA-AG-A016-01	CMS2	MSS	YES	unknown	Alive	NRC1	gene cluster A		0	276
TCGA-AG-3592-01	CMS2	MSI-L	NO	unknown	Alive	NRC1	gene cluster B		0	1035
TCGA-AG-3728-01	CMS4	MSS	NO	unknown	Alive	NRC1	gene cluster A		0	912
TCGA-AG-3890-01	CMS2	MSS	YES	unknown	Alive	NRC1	gene cluster A		0	518
TCGA-AG-3612-01	CMS2	MSS	NO	unknown	Alive	NRC1	gene cluster B		0	608
TCGA-AG-A00Y-01	CMS2	MSS	NO	unknown	Dead	NRC1	gene cluster A		0	700
TCGA-DC-6155-01	CMS2	MSS	NO	unknown	Alive	NRC1	gene cluster A		0	425
TCGA-AG-3582-01	CMS2	MSS	NO	unknown	Alive	NRC1	gene cluster B		1	1096
TCGA-EI-6513-01	CMS2	MSS	NO	unknown	Alive	NRC1	gene cluster B		0	497
TCGA-DT-5265-01	CMS4	MSS	unknown	unknown	Alive	NRC1	gene cluster B		0	384
TCGA-AG-3883-01	CMS4	MSS	YES	unknown	Alive	NRC1	gene cluster A		0	31
TCGA-AG-4005-01	CMS1	MSS	YES	unknown	Alive	NRC1	gene cluster B		0	427
TCGA-AG-3909-01	CMS2	MSS	YES	unknown	Alive	NRC1	gene cluster B		0	608
TCGA-AG-3611-01	CMS3	MSS	NO	unknown	Alive	NRC1	gene cluster B		0	424
TCGA-AG-A02G-01	CMS2	MSS	YES	unknown	Dead	NRC1	gene cluster A		1	1185
TCGA-A6-3807-01	CMS2	MSS	YES	stage III	Alive	NRC2	gene cluster B		0	1054
TCGA-A6-A566-01	CMS4	unknown	YES	stage III	Dead	NRC2	gene cluster C		1	758
TCGA-AZ-6600-01	CMS4	unknown	YES	stage IV	Alive	NRC2	gene cluster B		1	368
TCGA-AY-A71X-01	CMS3	MSS	NO	stage I	Alive	NRC2	gene cluster B		0	588
TCGA-AA-3696-01	CMS2	MSS	NO	stage IV	Alive	NRC2	gene cluster B		1	153
TCGA-CA-5254-01	CMS1	MSI-L	unknown	stage II	Alive	NRC2	gene cluster B		0	386
TCGA-A6-6782-01	CMS4	MSS	NO	stage II	Alive	NRC2	gene cluster B		0	617
TCGA-D5-6537-01	CMS2	MSS	YES	stage III	Alive	NRC2	gene cluster B		1	146
TCGA-AA-3534-01	CMS2	MSS	YES	stage II	Alive	NRC2	gene cluster C		0	882
TCGA-G4-6315-01	CMS3	MSS	NO	stage IV	Alive	NRC2	gene cluster B		0	1883
TCGA-G4-6317-01	CMS2	MSI-L	unknown	stage III	Alive	NRC2	gene cluster A		0	1095
TCGA-F4-6704-01	CMS4	MSS	NO	stage III	Alive	NRC2	gene cluster B		0	47
TCGA-DM-A1D8-01	CMS2	MSS	unknown	unknown	Alive	NRC2	gene cluster B		1	383
TCGA-D5-5537-01	CMS2	MSS	NO	unknown	Alive	NRC2	gene cluster B		1	1381
TCGA-AU-6004-01	CMS1	MSI-H	NO	stage I	Alive	NRC2	gene cluster B		0	824
TCGA-AA-3664-01	CMS3	MSS	NO	stage II	Alive	NRC2	gene cluster B		0	1643
TCGA-AA-A00Z-01	CMS2	MSS	YES	stage II	Alive	NRC2	gene cluster B		0	669
TCGA-NH-A8F7-01	CMS2	Indeterminate	NO	stage II	Alive	NRC2	gene cluster B		0	543
TCGA-CM-6164-01	CMS2	MSS	NO	stage II	Dead	NRC2	gene cluster B		0	883
TCGA-AA-A01Q-01	CMS3	MSI-H	YES	stage II	Alive	NRC2	gene cluster B		0	31
TCGA-DM-A28K-01	CMS3	MSS	NO	stage II	Dead	NRC2	gene cluster B		0	2988
TCGA-QG-A5YW-01	CMS3	MSI-L	NO	stage III	Alive	NRC2	gene cluster B		0	896
TCGA-AA-A02F-01	CMS2	MSS	YES	stage IV	Alive	NRC2	gene cluster B		0	1216
TCGA-DM-A1DA-01	CMS3	MSI-L	unknown	stage III	Dead	NRC2	gene cluster B		1	228
TCGA-A6-2682-01	CMS4	unknown	YES	stage IV	Alive	NRC2	gene cluster A		1	424
TCGA-AD-A5EK-01	CMS2	MSS	unknown	stage I	Alive	NRC2	gene cluster B		0	500
TCGA-AU-3779-01	CMS2	unknown	NO	stage II	Alive	NRC2	gene cluster B		0	441
TCGA-AA-3519-01	CMS2	MSS	NO	stage III	Alive	NRC2	gene cluster B		0	276
TCGA-AA-A00D-01	CMS1	MSS	NO	stage I	Alive	NRC2	gene cluster B		0	578
TCGA-AD-6899-01	CMS4	MSS	YES	stage III	Alive	NRC2	gene cluster B		1	176
TCGA-F4-6570-01	CMS1	MSI-H	NO	stage II	Alive	NRC2	gene cluster B		1	188
TCGA-DM-A28C-01	CMS2	MSS	unknown	stage II	Alive	NRC2	gene cluster C		1	2475
TCGA-AA-3518-01	CMS1	MSI-H	NO	stage II	Alive	NRC2	gene cluster B		0	31
TCGA-AA-3517-01	CMS2	MSI-L	NO	stage II	Alive	NRC2	gene cluster A		0	1186
TCGA-AY-A8YK-01	CMS2	MSS	YES	stage IV	Alive	NRC2	gene cluster B		0	573
TCGA-AA-A00E-01	CMS1	MSI-H	NO	stage II	Alive	NRC2	gene cluster B		0	913
TCGA-A6-6652-01	CMS2	MSS	NO	stage IV	Alive	NRC2	gene cluster B		0	751
TCGA-CM-4743-01	CMS1	MSI-H	YES	stage II	Alive	NRC2	gene cluster B		0	701
TCGA-3L-AA1B-01	CMS2	MSS	NO	stage I	Alive	NRC2	gene cluster B		0	475
TCGA-F4-6854-01	CMS4	MSS	NO	stage II	Dead	NRC2	gene cluster B		0	16
TCGA-AZ-4315-01	CMS1	MSS	NO	stage II	Alive	NRC2	gene cluster C		0	1776
TCGA-A6-5657-01	CMS4	MSS	YES	stage III	Alive	NRC2	gene cluster B		0	962
TCGA-A6-A567-01	CMS2	unknown	YES	stage IV	Alive	NRC2	gene cluster B		1	1881
TCGA-A6-2684-01	CMS4	unknown	NO	stage I	Dead	NRC2	gene cluster C		0	1127
TCGA-AD-6895-01	CMS1	MSI-H	YES	stage III	Alive	NRC2	gene cluster B		0	763
TCGA-CM-5868-01	CMS4	MSS	YES	stage IV	Alive	NRC2	gene cluster B		0	518
TCGA-AZ-4616-01	CMS1	unknown	YES	stage IV	Alive	NRC2	gene cluster B		1	156
TCGA-AZ-4313-01	CMS3	MSI-H	YES	stage I	Alive	NRC2	gene cluster A		0	2310
TCGA-DM-A282-01	CMS2	MSS	NO	stage II	Alive	NRC2	gene cluster B		0	4233
TCGA-AD-6889-01	CMS1	MSI-H	NO	stage II	Alive	NRC2	gene cluster B		1	2532
TCGA-DM-A1D6-01	CMS3	MSS	NO	stage II	Alive	NRC2	gene cluster B		1	570
TCGA-AA-3811-01	CMS1	MSI-H	YES	stage III	Dead	NRC2	gene cluster B		1	306
TCGA-AA-A01V-01	CMS3	MSS	unknown	stage I	Alive	NRC2	gene cluster A		0	31
TCGA-G4-6625-01	CMS2	MSS	NO	stage II	Alive	NRC2	gene cluster B		0	2792
TCGA-AA-3973-01	CMS2	MSI-L	YES	stage IV	Alive	NRC2	gene cluster A		0	397
TCGA-AA-A010-01	CMS3	MSI-L	NO	stage II	Alive	NRC2	gene cluster B		0	1064
TCGA-AA-3821-01	CMS1	MSI-H	unknown	stage I	Alive	NRC2	gene cluster C		0	31
TCGA-QG-A5YV-01	CMS2	MSS	NO	stage III	Alive	NRC2	gene cluster B		0	1301
TCGA-AA-A01G-01	CMS2	MSI-L	NO	stage II	Alive	NRC2	gene cluster B		0	365
TCGA-DM-A28E-01	CMS2	MSS	NO	stage II	Alive	NRC2	gene cluster B		0	3648
TCGA-CM-6171-01	CMS1	MSI-H	NO	stage I	Alive	NRC2	gene cluster C		0	427
TCGA-CM-6163-01	CMS2	MSS	NO	stage I	Dead	NRC2	gene cluster B		0	427
TCGA-AZ-6598-01	CMS1	unknown	NO	stage II	Dead	NRC2	gene cluster B		1	1503
TCGA-AA-A00W-01	CMS2	MSS	NO	stage I	Alive	NRC2	gene cluster B		0	456
TCGA-DM-A0XF-01	CMS2	unknown	NO	stage III	Alive	NRC2	gene cluster B		1	1162
TCGA-DM-A0XD-01	CMS1	unknown	NO	stage II	Alive	NRC2	gene cluster B		1	743
TCGA-DM-A28M-01	CMS3	MSS	NO	stage II	Alive	NRC2	gene cluster C		0	2895
TCGA-AA-3819-01	CMS2	MSI-L	YES	stage II	Alive	NRC2	gene cluster B		0	761
TCGA-4T-AA8H-01	CMS3	Indeterminate	NO	stage II	Alive	NRC2	gene cluster B		0	385
TCGA-AA-A02R-01	CMS1	unknown	YES	stage II	Alive	NRC2	gene cluster B		1	670
TCGA-AA-3979-01	CMS2	MSS	NO	stage II	Alive	NRC2	gene cluster B		0	730
TCGA-DM-A0X9-01	CMS3	MSS	NO	stage II	Alive	NRC2	gene cluster B		0	3641
TCGA-AA-3855-01	CMS2	MSI-L	YES	stage I	Alive	NRC2	gene cluster B		0	975
TCGA-NH-A6GA-01	CMS2	MSS	YES	stage III	Alive	NRC2	gene cluster B		1	302
TCGA-D5-6529-01	CMS4	MSI-L	NO	stage II	Alive	NRC2	gene cluster B		0	614
TCGA-5M-AAT4-01	CMS2	unknown	unknown	stage IV	Alive	NRC2	gene cluster B		1	49
TCGA-CM-6675-01	CMS1	MSS	NO	stage IV	Alive	NRC2	gene cluster B		0	397
TCGA-AA-3510-01	CMS3	MSS	NO	stage II	Alive	NRC2	gene cluster B		0	1946
TCGA-AA-3875-01	CMS2	MSS	NO	stage I	Dead	NRC2	gene cluster C		0	549
TCGA-G4-6309-01	CMS3	MSI-H	NO	stage III	Alive	NRC2	gene cluster B		0	2600
TCGA-QL-A97D-01	CMS2	MSS	unknown	stage I	Alive	NRC2	gene cluster B		0	666
TCGA-5M-AATE-01	CMS2	MSS	NO	stage II	Alive	NRC2	gene cluster B		0	1200
TCGA-A6-2686-01	CMS1	MSI-H	NO	stage II	Alive	NRC2	gene cluster B		1	1126
TCGA-G4-6626-01	CMS2	unknown	NO	stage II	Alive	NRC2	gene cluster B		1	1
TCGA-QG-A5YX-01	CMS3	MSI-L	NO	stage II	Alive	NRC2	gene cluster C		0	1003
TCGA-4N-A93T-01	CMS3	MSS	NO	stage III	Alive	NRC2	gene cluster A		0	146
TCGA-AA-A00K-01	CMS3	MSI-L	NO	stage II	Alive	NRC2	gene cluster B		0	549
TCGA-CM-5864-01	CMS2	MSS	NO	stage I	Alive	NRC2	gene cluster C		0	457
TCGA-G4-6304-01	CMS3	MSI-H	NO	stage II	Alive	NRC2	gene cluster B		0	1631
TCGA-AA-3846-01	CMS2	MSS	YES	stage II	Alive	NRC2	gene cluster C		0	518
TCGA-A6-5656-01	CMS2	unknown	NO	stage I	Alive	NRC2	gene cluster B		0	1001
TCGA-AA-3844-01	CMS3	MSS	YES	stage III	Alive	NRC2	gene cluster C		0	454
TCGA-DM-A280-01	CMS1	MSS	NO	stage II	Alive	NRC2	gene cluster B		1	236
TCGA-A6-4107-01	CMS2	MSS	YES	stage III	Alive	NRC2	gene cluster B		0	987
TCGA-DM-A1D0-01	CMS2	MSS	NO	stage II	Alive	NRC2	gene cluster B		0	3974
TCGA-AA-3678-01	CMS2	MSS	YES	stage III	Alive	NRC2	gene cluster B		0	1430
TCGA-AZ-6606-01	CMS3	unknown	YES	stage IV	Alive	NRC2	gene cluster B		1	357
TCGA-D5-6920-01	CMS3	MSS	NO	stage II	Alive	NRC2	gene cluster B		0	377
TCGA-D5-6540-01	CMS1	MSI-H	NO	stage I	Alive	NRC2	gene cluster B		0	491
TCGA-DM-A1HB-01	CMS1	MSI-H	NO	stage III	Alive	NRC2	gene cluster C		0	4126
TCGA-DM-A1D9-01	CMS3	MSS	NO	stage II	Alive	NRC2	gene cluster B		0	4270
TCGA-G4-6294-01	CMS2	unknown	NO	stage IV	Alive	NRC2	gene cluster C		1	858
TCGA-CM-6170-01	CMS2	MSS	NO	stage I	Alive	NRC2	gene cluster C		0	457
TCGA-G4-6311-01	CMS4	MSS	YES	stage III	Alive	NRC2	gene cluster B		0	1199
TCGA-CM-4744-01	CMS3	MSS	YES	stage I	Alive	NRC2	gene cluster B		0	609
TCGA-G4-6310-01	CMS4	MSS	NO	stage III	Alive	NRC2	gene cluster C		0	1935
TCGA-DM-A1D7-01	CMS2	MSS	NO	stage II	Alive	NRC2	gene cluster B		1	405
TCGA-NH-A6GB-01	CMS2	MSS	NO	stage III	Alive	NRC2	gene cluster B		0	476
TCGA-AA-3837-01	CMS2	MSS	YES	stage II	Alive	NRC2	gene cluster B		0	1186
TCGA-CM-5348-01	CMS4	MSS	YES	stage III	Alive	NRC2	gene cluster B		0	699
TCGA-AD-6963-01	CMS2	MSS	NO	unknown	Alive	NRC2	gene cluster B		0	834
TCGA-AA-3511-01	CMS4	MSS	YES	stage II	Alive	NRC2	gene cluster B		0	212
TCGA-D5-6532-01	CMS2	MSI-L	NO	stage II	Alive	NRC2	gene cluster B		0	555
TCGA-G4-6586-01	CMS1	MSI-H	YES	stage II	Alive	NRC2	gene cluster B		0	1089
TCGA-D5-6927-01	CMS1	unknown	NO	stage II	Alive	NRC2	gene cluster B		0	287
TCGA-A6-2672-01	CMS1	MSI-H	YES	stage III	Dead	NRC2	gene cluster B		0	1419
TCGA-AY-A54L-01	CMS3	MSI-L	NO	stage I	Dead	NRC2	gene cluster C		0	525
TCGA-D5-6898-01	CMS4	MSS	NO	stage I	Alive	NRC2	gene cluster B		0	229
TCGA-A6-6140-01	CMS2	MSS	NO	stage II	Alive	NRC2	gene cluster B		0	734
TCGA-G4-6320-01	CMS3	MSI-H	YES	stage III	Alive	NRC2	gene cluster B		0	804
TCGA-AA-A00J-01	CMS1	MSI-H	YES	stage III	Alive	NRC2	gene cluster C		0	549
TCGA-A6-6649-01	CMS1	MSS	YES	stage III	Alive	NRC2	gene cluster B		0	735
TCGA-NH-A50T-01	CMS2	MSS	NO	stage II	Alive	NRC2	gene cluster B		0	553
TCGA-DM-A285-01	CMS4	unknown	unknown	stage IV	Alive	NRC2	gene cluster B		1	179
TCGA-AA-A00U-01	CMS3	MSS	NO	stage III	Dead	NRC2	gene cluster B		0	518
TCGA-AA-3970-01	CMS2	MSS	NO	stage II	Dead	NRC2	gene cluster C		0	1096
TCGA-AA-A01D-01	CMS4	MSS	YES	stage III	Alive	NRC2	gene cluster B		1	334
TCGA-AD-6890-01	CMS2	MSS	NO	unknown	Alive	NRC2	gene cluster B		0	746
TCGA-A6-A5ZU-01	CMS4	MSS	YES	stage III	Alive	NRC2	gene cluster B		0	293
TCGA-AA-3697-01	CMS2	MSI-L	unknown	stage II	Alive	NRC2	gene cluster B		0	2587
TCGA-CM-6172-01	CMS3	MSS	NO	stage III	Alive	NRC2	gene cluster C		0	335
TCGA-T9-A92H-01	CMS2	MSS	NO	stage II	Alive	NRC2	gene cluster B		0	362
TCGA-AD-6965-01	CMS2	MSS	YES	stage III	Alive	NRC2	gene cluster B		0	805
TCGA-CM-4751-01	CMS1	MSS	YES	stage III	Alive	NRC2	gene cluster B		0	822
TCGA-AA-3660-01	CMS2	MSS	NO	stage II	Alive	NRC2	gene cluster B		0	2375
TCGA-DM-A288-01	CMS3	MSS	NO	stage III	Alive	NRC2	gene cluster B		1	427
TCGA-AD-6888-01	CMS2	MSS	YES	stage III	Alive	NRC2	gene cluster B		1	472
TCGA-AA-3815-01	CMS1	MSI-H	YES	stage II	Alive	NRC2	gene cluster B		0	1005
TCGA-D5-6931-01	CMS1	MSS	YES	stage III	Dead	NRC2	gene cluster B		0	365
TCGA-A6-6650-01	CMS2	unknown	NO	stage II	Dead	NRC2	gene cluster C		0	627
TCGA-G4-6306-01	CMS2	MSS	unknown	unknown	Alive	NRC2	gene cluster B		0	1359
TCGA-AA-3673-01	CMS2	MSS	NO	stage II	Alive	NRC2	gene cluster B		0	1522
TCGA-AA-3986-01	CMS2	MSS	NO	stage I	Alive	NRC2	gene cluster C		0	580
TCGA-AA-3492-01	CMS1	MSI-H	NO	stage II	Alive	NRC2	gene cluster B		1	1
TCGA-AY-6197-01	CMS1	MSI-H	NO	stage II	Dead	NRC2	gene cluster B		0	652
TCGA-CA-5797-01	CMS2	MSS	unknown	stage II	Alive	NRC2	gene cluster B		0	383
TCGA-AA-3941-01	CMS3	MSI-L	YES	stage IV	Alive	NRC2	gene cluster B		0	730
TCGA-D5-6924-01	CMS4	MSS	NO	stage II	Alive	NRC2	gene cluster B		0	435
TCGA-CM-5349-01	CMS4	MSS	NO	stage II	Alive	NRC2	gene cluster B		0	915
TCGA-AA-3842-01	CMS4	MSS	YES	stage III	Alive	NRC2	gene cluster B		0	1126
TCGA-CM-6677-01	CMS4	MSS	NO	stage II	Alive	NRC2	gene cluster B		0	337
TCGA-D5-6538-01	CMS2	MSI-L	NO	stage III	Alive	NRC2	gene cluster B		0	521
TCGA-A6-A565-01	CMS1	unknown	YES	stage III	Alive	NRC2	gene cluster B		1	494
TCGA-F4-6808-01	CMS2	MSS	NO	stage I	Alive	NRC2	gene cluster A		0	1024
TCGA-AA-A029-01	CMS3	MSI-L	unknown	stage II	Alive	NRC2	gene cluster B		0	1581
TCGA-AA-A00A-01	CMS1	MSI-H	NO	stage II	Alive	NRC2	gene cluster B		0	1157
TCGA-DM-A1D4-01	CMS3	MSI-L	NO	stage II	Dead	NRC2	gene cluster B		1	2821
TCGA-AZ-4323-01	CMS4	unknown	unknown	stage IV	Alive	NRC2	gene cluster B		1	43
TCGA-BM-6198-01	CMS1	MSS	NO	unknown	Alive	NRC2	gene cluster B		0	646
TCGA-EI-6508-01	CMS3	MSS	YES	unknown	Alive	NRC2	gene cluster C		0	636
TCGA-EI-6881-01	CMS3	MSS	NO	unknown	Alive	NRC2	gene cluster C		0	499
TCGA-F5-6864-01	CMS4	MSI-L	NO	unknown	Alive	NRC2	gene cluster B		0	379
TCGA-AF-2692-01	CMS3	MSS	NO	unknown	Dead	NRC2	gene cluster B		0	412
TCGA-CI-6620-01	CMS3	MSS	unknown	unknown	Dead	NRC2	gene cluster B		0	1009
TCGA-AG-A036-01	CMS2	MSS	unknown	unknown	Dead	NRC2	gene cluster B		0	3562
TCGA-AG-3581-01	CMS2	MSS	NO	unknown	Alive	NRC2	gene cluster B		0	215
TCGA-DY-A1DE-01	CMS2	MSS	NO	unknown	Alive	NRC2	gene cluster B		0	3932
TCGA-AG-4022-01	CMS4	MSS	YES	unknown	Alive	NRC2	gene cluster C		0	1400
TCGA-CL-4957-01	CMS2	MSS	unknown	unknown	Dead	NRC2	gene cluster C		1	425
TCGA-AG-3605-01	CMS2	MSS	YES	unknown	Alive	NRC2	gene cluster B		0	30
TCGA-DC-6157-01	CMS2	MSS	NO	unknown	Alive	NRC2	gene cluster C		0	1581
TCGA-AG-3600-01	CMS1	MSS	YES	unknown	Alive	NRC2	gene cluster B		0	184
TCGA-DC-4749-01	CMS2	MSS	YES	unknown	Alive	NRC2	gene cluster C		0	762
TCGA-AG-A011-01	CMS3	MSS	NO	unknown	Alive	NRC2	gene cluster B		0	1126
TCGA-AF-2691-01	CMS2	MSS	NO	unknown	Alive	NRC2	gene cluster B		0	1309
TCGA-AF-6136-01	CMS3	MSS	YES	unknown	Dead	NRC2	gene cluster B		0	741
TCGA-EI-7002-01	CMS2	MSI-L	YES	unknown	Dead	NRC2	gene cluster B		0	364
TCGA-AG-3887-01	CMS3	MSS	YES	unknown	Dead	NRC2	gene cluster B		0	1124
TCGA-DC-6154-01	CMS2	MSI-H	YES	unknown	Alive	NRC2	gene cluster B		0	365
TCGA-AG-A020-01	CMS3	MSS	YES	unknown	Alive	NRC2	gene cluster B		0	31
TCGA-AG-A008-01	CMS3	MSS	NO	unknown	Alive	NRC2	gene cluster B		0	424
TCGA-AG-3902-01	CMS3	MSS	NO	unknown	Alive	NRC2	gene cluster B		0	974
TCGA-EI-6512-01	CMS3	MSS	NO	unknown	Alive	NRC2	gene cluster B		0	538
TCGA-AG-3580-01	CMS2	MSS	NO	unknown	Alive	NRC2	gene cluster C		0	244
TCGA-DY-A1H8-01	CMS2	MSS	unknown	unknown	Alive	NRC2	gene cluster A		1	992
TCGA-AG-3574-01	CMS2	MSS	NO	unknown	Dead	NRC2	gene cluster B		1	91
TCGA-AG-4021-01	CMS4	MSS	YES	unknown	Alive	NRC2	gene cluster B		1	121
TCGA-AG-3898-01	CMS2	MSS	NO	unknown	Alive	NRC2	gene cluster B		0	1461
TCGA-AG-3583-01	CMS3	MSI-L	YES	unknown	Alive	NRC2	gene cluster C		1	610
TCGA-DY-A1DC-01	CMS2	unknown	NO	unknown	Dead	NRC2	gene cluster B		1	1258
TCGA-AG-3578-01	CMS3	MSS	NO	unknown	Alive	NRC2	gene cluster B		0	974
TCGA-G5-6233-01	CMS1	unknown	YES	unknown	Alive	NRC2	gene cluster B		1	556
TCGA-F5-6571-01	CMS4	MSI-L	NO	unknown	Alive	NRC2	gene cluster C		0	1288
TCGA-DY-A1DG-01	CMS2	unknown	unknown	unknown	Dead	NRC2	gene cluster A		1	1566
TCGA-AG-3732-01	CMS3	MSS	YES	unknown	Alive	NRC2	gene cluster C		0	1003
TCGA-EI-6883-01	CMS2	MSS	NO	unknown	Alive	NRC2	gene cluster B		0	350
TCGA-EI-6509-01	CMS4	MSS	YES	unknown	Dead	NRC2	gene cluster B		0	517
TCGA-AF-A56N-01	CMS2	MSS	NO	unknown	Alive	NRC2	gene cluster B		0	360
TCGA-AG-A002-01	CMS1	MSS	unknown	unknown	Dead	NRC2	gene cluster B		0	638
TCGA-EI-6507-01	CMS1	MSI-H	NO	unknown	Alive	NRC2	gene cluster C		0	607
TCGA-F5-6812-01	CMS4	MSS	NO	unknown	Alive	NRC2	gene cluster B		0	1110
TCGA-AG-A00C-01	CMS2	MSS	YES	unknown	Alive	NRC2	gene cluster B		0	183
TCGA-AG-A023-01	CMS4	MSS	YES	unknown	Alive	NRC2	gene cluster B		1	1581
TCGA-DY-A0XA-01	CMS2	MSS	NO	unknown	Dead	NRC2	gene cluster B		0	3846
TCGA-AA-3870-01	CMS4	MSS	YES	stage IV	Dead	NRC3	gene cluster B		0	912
TCGA-AA-3532-01	CMS4	MSS	NO	stage II	Dead	NRC3	gene cluster B		0	882
TCGA-A6-5662-01	CMS2	MSS	YES	stage IV	Alive	NRC3	gene cluster B		0	718
TCGA-AA-3680-01	CMS3	MSI-L	YES	stage IV	Alive	NRC3	gene cluster C		1	335
TCGA-AZ-6605-01	CMS4	unknown	YES	stage III	Alive	NRC3	gene cluster B		1	159
TCGA-CA-6716-01	CMS2	MSS	unknown	stage II	Alive	NRC3	gene cluster C		0	371
TCGA-AA-3516-01	CMS1	MSI-H	NO	stage III	Alive	NRC3	gene cluster B		1	396
TCGA-CK-4951-01	CMS1	MSI-H	NO	stage II	Alive	NRC3	gene cluster C		1	2134
TCGA-AA-A00R-01	CMS1	MSI-H	NO	stage I	Alive	NRC3	gene cluster B		0	30
TCGA-G4-6314-01	CMS4	MSS	YES	stage IV	Dead	NRC3	gene cluster B		0	1093
TCGA-CK-5914-01	CMS2	MSS	NO	stage III	Alive	NRC3	gene cluster C		0	669
TCGA-AA-3862-01	CMS3	MSS	YES	stage II	Alive	NRC3	gene cluster B		0	914
TCGA-CM-6162-01	CMS4	MSI-H	YES	stage III	Dead	NRC3	gene cluster C		0	365
TCGA-AZ-5407-01	CMS3	MSS	NO	stage I	Alive	NRC3	gene cluster C		0	2683
TCGA-AA-3525-01	CMS3	MSI-H	NO	stage III	Alive	NRC3	gene cluster B		0	1
TCGA-AY-A69D-01	CMS3	MSI-L	NO	stage II	Alive	NRC3	gene cluster B		0	543
TCGA-CM-5862-01	CMS2	unknown	NO	stage IV	Alive	NRC3	gene cluster C		1	153
TCGA-CM-5341-01	CMS4	MSS	YES	stage III	Alive	NRC3	gene cluster C		0	884
TCGA-A6-6781-01	CMS4	unknown	YES	stage III	Alive	NRC3	gene cluster C		0	598
TCGA-A6-6653-01	CMS1	MSI-H	NO	stage I	Alive	NRC3	gene cluster C		0	742
TCGA-AA-3818-01	CMS3	unknown	NO	stage II	Alive	NRC3	gene cluster B		1	30
TCGA-G4-6303-01	CMS4	MSI-L	YES	stage IV	Alive	NRC3	gene cluster B		1	2003
TCGA-A6-6654-01	CMS4	MSS	YES	stage III	Alive	NRC3	gene cluster B		0	726
TCGA-A6-5667-01	CMS4	MSS	YES	stage III	Alive	NRC3	gene cluster B		0	887
TCGA-G4-6627-01	CMS4	MSI-L	NO	stage II	Alive	NRC3	gene cluster C		0	2175
TCGA-AA-3955-01	CMS2	MSS	YES	stage III	Dead	NRC3	gene cluster C		0	638
TCGA-CK-5912-01	CMS2	MSS	NO	stage I	Alive	NRC3	gene cluster C		1	1493
TCGA-G4-6321-01	CMS3	MSI-L	NO	stage III	Alive	NRC3	gene cluster C		0	672
TCGA-F4-6806-01	CMS3	MSS	NO	stage I	Dead	NRC3	gene cluster B		0	1260
TCGA-CM-6167-01	CMS4	MSS	YES	stage III	Dead	NRC3	gene cluster C		0	456
TCGA-AA-3950-01	CMS1	MSI-H	NO	stage II	Dead	NRC3	gene cluster C		0	730
TCGA-A6-2675-01	CMS4	unknown	NO	stage II	Dead	NRC3	gene cluster B		0	1321
TCGA-AY-5543-01	CMS2	MSS	NO	stage IV	Alive	NRC3	gene cluster C		0	1004
TCGA-D5-6531-01	CMS4	MSS	NO	stage II	Dead	NRC3	gene cluster B		0	540
TCGA-CA-5796-01	CMS3	MSS	unknown	stage II	Alive	NRC3	gene cluster C		0	377
TCGA-AZ-4615-01	CMS1	MSI-H	YES	stage III	Dead	NRC3	gene cluster C		0	1002
TCGA-AZ-6599-01	CMS3	unknown	NO	stage I	Dead	NRC3	gene cluster B		1	206
TCGA-AA-3509-01	CMS2	MSS	NO	stage II	Dead	NRC3	gene cluster C		0	1915
TCGA-D5-5541-01	CMS4	MSS	NO	stage III	Dead	NRC3	gene cluster C		0	1701
TCGA-AA-3561-01	CMS2	MSS	NO	stage II	Dead	NRC3	gene cluster C		0	424
TCGA-D5-6530-01	CMS3	MSI-H	NO	stage I	Alive	NRC3	gene cluster B		0	621
TCGA-CA-6715-01	CMS2	MSS	unknown	stage III	Dead	NRC3	gene cluster C		0	383
TCGA-CK-5916-01	CMS1	unknown	YES	stage I	Dead	NRC3	gene cluster C		1	643
TCGA-AA-A01I-01	CMS2	MSS	NO	stage I	Dead	NRC3	gene cluster C		0	943
TCGA-A6-3808-01	CMS4	MSI-L	NO	stage II	Dead	NRC3	gene cluster C		0	1014
TCGA-A6-6780-01	CMS1	unknown	NO	stage II	Dead	NRC3	gene cluster C		0	612
TCGA-CK-6748-01	CMS4	MSS	NO	stage IV	Dead	NRC3	gene cluster B		0	61
TCGA-AA-3994-01	CMS1	MSS	NO	stage III	Dead	NRC3	gene cluster B		0	822
TCGA-CM-6674-01	CMS1	MSI-H	NO	stage II	Dead	NRC3	gene cluster C		0	394
TCGA-A6-3810-01	CMS4	unknown	NO	stage II	Dead	NRC3	gene cluster C		0	1111
TCGA-CK-5913-01	CMS1	MSI-H	NO	stage II	Dead	NRC3	gene cluster C		0	1561
TCGA-F4-6461-01	CMS4	MSS	NO	stage III	Alive	NRC3	gene cluster B		1	338
TCGA-A6-6651-01	CMS4	MSS	YES	stage III	Alive	NRC3	gene cluster B		0	662
TCGA-CA-6718-01	CMS1	MSS	unknown	stage II	Alive	NRC3	gene cluster B		1	306
TCGA-CM-6169-01	CMS4	MSS	YES	stage II	Dead	NRC3	gene cluster C		0	396
TCGA-5M-AAT6-01	CMS1	unknown	YES	stage IV	Dead	NRC3	gene cluster B		1	290
TCGA-AA-3655-01	CMS3	MSS	NO	stage II	Dead	NRC3	gene cluster B		0	1856
TCGA-DM-A28G-01	CMS3	MSS	NO	stage II	Alive	NRC3	gene cluster C		1	1849
TCGA-AA-3681-01	CMS3	MSS	NO	stage III	Alive	NRC3	gene cluster B		0	182
TCGA-AA-3489-01	CMS4	MSS	unknown	stage II	Alive	NRC3	gene cluster B		1	214
TCGA-AM-5820-01	CMS4	MSS	YES	stage IV	Alive	NRC3	gene cluster C		0	14
TCGA-AA-3555-01	CMS1	MSS	NO	stage II	Dead	NRC3	gene cluster C		0	911
TCGA-CA-5255-01	CMS3	MSS	unknown	stage II	Dead	NRC3	gene cluster B		0	376
TCGA-AA-3939-01	CMS3	MSS	NO	stage II	Dead	NRC3	gene cluster C		0	395
TCGA-D5-7000-01	CMS1	MSS	NO	stage I	Alive	NRC3	gene cluster B		0	312
TCGA-D5-5538-01	CMS4	MSS	NO	stage III	Dead	NRC3	gene cluster C		1	1661
TCGA-CM-5860-01	CMS4	MSS	NO	stage II	Dead	NRC3	gene cluster C		0	974
TCGA-F4-6805-01	CMS4	MSS	NO	stage II	Alive	NRC3	gene cluster C		0	1047
TCGA-CA-5256-01	CMS2	MSS	unknown	stage II	Alive	NRC3	gene cluster C		0	379
TCGA-AA-3685-01	CMS2	MSS	YES	stage II	Alive	NRC3	gene cluster C		0	1127
TCGA-AA-3495-01	CMS2	MSS	unknown	stage I	Alive	NRC3	gene cluster C		0	1127
TCGA-A6-5665-01	CMS1	MSI-H	YES	stage II	Dead	NRC3	gene cluster C		0	671
TCGA-AA-3554-01	CMS1	MSI-H	NO	stage II	Dead	NRC3	gene cluster B		0	546
TCGA-AA-3866-01	CMS4	MSI-L	NO	stage I	Alive	NRC3	gene cluster C		0	518
TCGA-A6-6142-01	CMS4	MSS	YES	stage IV	Alive	NRC3	gene cluster B		0	763
TCGA-CM-6680-01	CMS1	MSS	NO	stage III	Alive	NRC3	gene cluster B		0	366
TCGA-A6-4105-01	CMS2	unknown	NO	stage II	Dead	NRC3	gene cluster B		1	442
TCGA-AZ-6607-01	CMS4	unknown	YES	stage IV	Alive	NRC3	gene cluster B		1	97
TCGA-AA-3675-01	CMS2	MSS	NO	stage II	Dead	NRC3	gene cluster C		0	1431
TCGA-CA-6717-01	CMS4	MSS	unknown	stage II	Dead	NRC3	gene cluster C		0	388
TCGA-CK-6751-01	CMS1	MSS	NO	stage I	Dead	NRC3	gene cluster B		0	518
TCGA-CM-6161-01	CMS2	MSI-L	NO	stage I	Alive	NRC3	gene cluster C		0	457
TCGA-AA-3666-01	CMS1	unknown	NO	stage III	Dead	NRC3	gene cluster B		1	61
TCGA-A6-5666-01	CMS2	MSI-L	NO	stage II	Alive	NRC3	gene cluster C		0	995
TCGA-CM-6168-01	CMS4	MSI-L	NO	stage II	Alive	NRC3	gene cluster C		0	395
TCGA-AA-3861-01	CMS3	MSI-L	YES	stage II	Dead	NRC3	gene cluster C		0	914
TCGA-CK-6747-01	CMS3	MSI-H	NO	stage II	Dead	NRC3	gene cluster C		0	820
TCGA-AA-3977-01	CMS1	MSS	NO	unknown	Dead	NRC3	gene cluster C		0	761
TCGA-AA-3560-01	CMS3	MSS	YES	stage III	Alive	NRC3	gene cluster C		0	608
TCGA-AA-3972-01	CMS2	MSI-L	NO	stage IV	Alive	NRC3	gene cluster C		0	1551
TCGA-CK-4950-01	CMS3	MSS	NO	stage III	Dead	NRC3	gene cluster B		0	2599
TCGA-AA-3877-01	CMS1	MSI-H	NO	stage I	Alive	NRC3	gene cluster C		0	943
TCGA-AA-3947-01	CMS1	MSI-H	NO	stage II	Alive	NRC3	gene cluster C		0	1004
TCGA-D5-6533-01	CMS2	MSS	NO	unknown	Dead	NRC3	gene cluster B		0	775
TCGA-G4-6588-01	CMS1	MSI-H	NO	stage II	Alive	NRC3	gene cluster B		0	796
TCGA-AM-5821-01	CMS1	MSI-H	NO	stage II	Alive	NRC3	gene cluster C		0	28
TCGA-AA-3851-01	CMS3	MSS	YES	stage II	Dead	NRC3	gene cluster B		0	1006
TCGA-AA-3982-01	CMS2	MSI-L	YES	stage III	Alive	NRC3	gene cluster C		0	822
TCGA-D5-6930-01	CMS1	MSI-H	NO	stage II	Alive	NRC3	gene cluster B		0	406
TCGA-AA-3864-01	CMS1	MSI-H	NO	stage II	Alive	NRC3	gene cluster C		0	1612
TCGA-A6-6137-01	CMS2	MSS	NO	stage III	Alive	NRC3	gene cluster B		0	824
TCGA-A6-6648-01	CMS2	MSS	NO	stage IV	Alive	NRC3	gene cluster C		0	766
TCGA-D5-6535-01	CMS1	MSS	YES	stage III	Dead	NRC3	gene cluster B		0	460
TCGA-D5-5540-01	CMS2	MSI-L	NO	stage II	Dead	NRC3	gene cluster C		0	1706
TCGA-CM-6166-01	CMS2	MSS	NO	stage I	Alive	NRC3	gene cluster C		0	669
TCGA-AA-3526-01	CMS2	MSI-L	NO	stage I	Alive	NRC3	gene cluster C		0	580
TCGA-AA-3930-01	CMS1	MSI-L	YES	stage IV	Alive	NRC3	gene cluster B		1	61
TCGA-AA-3854-01	CMS3	MSI-L	YES	stage I	Alive	NRC3	gene cluster C		0	1096
TCGA-AD-5900-01	CMS1	MSI-H	NO	stage I	Alive	NRC3	gene cluster B		0	370
TCGA-A6-6138-01	CMS4	MSS	NO	stage I	Alive	NRC3	gene cluster C		0	685
TCGA-F4-6807-01	CMS4	MSS	NO	stage III	Alive	NRC3	gene cluster C		0	1309
TCGA-AA-3522-01	CMS3	MSS	YES	stage II	Alive	NRC3	gene cluster C		0	1127
TCGA-G4-6297-01	CMS4	MSS	YES	stage IV	Alive	NRC3	gene cluster B		0	2506
TCGA-AA-3502-01	CMS3	MSI-L	unknown	stage I	Alive	NRC3	gene cluster B		0	1065
TCGA-AZ-6601-01	CMS1	unknown	YES	stage II	Dead	NRC3	gene cluster B		1	3042
TCGA-D5-6928-01	CMS1	MSI-H	NO	stage II	Alive	NRC3	gene cluster B		0	354
TCGA-AA-A02Y-01	CMS3	MSS	YES	stage I	Alive	NRC3	gene cluster B		0	1216
TCGA-AZ-5403-01	CMS4	unknown	NO	stage II	Alive	NRC3	gene cluster C		1	1910
TCGA-CM-6165-01	CMS4	MSS	NO	stage II	Alive	NRC3	gene cluster C		0	488
TCGA-QG-A5Z2-01	CMS3	MSI-H	NO	stage I	Alive	NRC3	gene cluster B		0	952
TCGA-A6-5661-01	CMS1	MSI-H	NO	stage II	Alive	NRC3	gene cluster C		0	1020
TCGA-AA-A01P-01	CMS1	MSI-H	YES	stage III	Alive	NRC3	gene cluster B		1	1158
TCGA-F4-6569-01	CMS4	MSS	NO	stage I	Alive	NRC3	gene cluster C		0	1087
TCGA-AA-3949-01	CMS1	MSI-H	NO	stage III	Alive	NRC3	gene cluster C		0	791
TCGA-F4-6463-01	CMS4	MSS	NO	stage II	Dead	NRC3	gene cluster C		0	1087
TCGA-CM-6678-01	CMS2	MSS	NO	stage IV	Dead	NRC3	gene cluster B		0	335
TCGA-CK-4952-01	CMS3	MSS	NO	stage III	Dead	NRC3	gene cluster B		0	475
TCGA-AD-6548-01	CMS4	MSI-L	NO	stage I	Alive	NRC3	gene cluster B		0	650
TCGA-CM-5861-01	CMS1	MSI-H	NO	stage II	Alive	NRC3	gene cluster C		0	457
TCGA-AA-A00N-01	CMS4	unknown	YES	stage II	Alive	NRC3	gene cluster B		1	122
TCGA-D5-6534-01	CMS4	MSS	NO	stage II	Dead	NRC3	gene cluster B		0	1316
TCGA-AA-3530-01	CMS3	MSS	NO	stage I	Dead	NRC3	gene cluster C		0	580
TCGA-G4-6293-01	CMS2	MSI-L	NO	stage III	Alive	NRC3	gene cluster B		0	4051
TCGA-AA-A024-01	CMS3	MSI-L	unknown	stage II	Alive	NRC3	gene cluster B		1	1188
TCGA-D5-5539-01	CMS4	MSS	YES	stage III	Alive	NRC3	gene cluster C		0	596
TCGA-A6-2678-01	CMS2	MSS	YES	stage III	Alive	NRC3	gene cluster C		0	1286
TCGA-AA-3710-01	CMS1	MSI-H	YES	stage II	Alive	NRC3	gene cluster B		0	821
TCGA-AY-6196-01	CMS4	unknown	YES	stage III	Dead	NRC3	gene cluster B		0	6
TCGA-A6-5660-01	CMS2	MSS	YES	stage III	Dead	NRC3	gene cluster C		0	888
TCGA-A6-6141-01	CMS3	MSS	NO	stage II	Alive	NRC3	gene cluster B		0	255
TCGA-NH-A50V-01	CMS4	MSI-L	NO	stage III	Dead	NRC3	gene cluster B		0	588
TCGA-AA-3980-01	CMS2	MSS	YES	stage I	Alive	NRC3	gene cluster C		0	242
TCGA-AA-3869-01	CMS2	MSS	YES	stage IV	Alive	NRC3	gene cluster C		1	822
TCGA-G4-6322-01	CMS3	MSI-L	YES	stage III	Alive	NRC3	gene cluster B		0	792
TCGA-AA-3520-01	CMS4	MSI-L	NO	stage II	Dead	NRC3	gene cluster B		0	731
TCGA-A6-5659-01	CMS2	unknown	NO	stage I	Alive	NRC3	gene cluster C		0	926
TCGA-A6-2676-01	CMS1	MSI-H	NO	stage II	Alive	NRC3	gene cluster B		1	1305
TCGA-D5-6539-01	CMS3	MSS	NO	unknown	Alive	NRC3	gene cluster C		0	380
TCGA-CM-5863-01	CMS1	MSS	NO	stage III	Dead	NRC3	gene cluster B		0	457
TCGA-AA-3663-01	CMS3	MSI-H	NO	stage II	Alive	NRC3	gene cluster C		0	212
TCGA-G4-6323-01	CMS3	MSS	NO	stage I	Alive	NRC3	gene cluster B		0	419
TCGA-F4-6703-01	CMS4	MSI-H	NO	stage II	Alive	NRC3	gene cluster B		0	1456
TCGA-AA-3976-01	CMS2	MSS	unknown	stage III	Alive	NRC3	gene cluster C		0	791
TCGA-AY-6386-01	CMS3	MSS	NO	stage III	Alive	NRC3	gene cluster B		0	542
TCGA-G4-6628-01	CMS1	MSI-H	NO	stage I	Alive	NRC3	gene cluster C		0	2424
TCGA-AA-3543-01	CMS1	MSI-H	NO	stage I	Alive	NRC3	gene cluster B		0	30
TCGA-A6-3809-01	CMS1	unknown	NO	stage II	Alive	NRC3	gene cluster C		0	996
TCGA-A6-2677-01	CMS2	unknown	YES	stage III	Alive	NRC3	gene cluster C		1	740
TCGA-AA-3831-01	CMS2	MSS	YES	stage II	Alive	NRC3	gene cluster B		0	547
TCGA-AD-6964-01	CMS4	MSI-H	YES	unknown	Alive	NRC3	gene cluster B		1	331
TCGA-A6-2674-01	CMS4	unknown	NO	stage IV	Alive	NRC3	gene cluster C		0	1331
TCGA-F4-6855-01	CMS4	MSI-L	NO	stage II	Dead	NRC3	gene cluster B		0	1442
TCGA-A6-5664-01	CMS4	MSS	YES	stage III	Alive	NRC3	gene cluster C		0	672
TCGA-AA-3833-01	CMS1	MSI-H	YES	stage II	Alive	NRC3	gene cluster B		0	485
TCGA-CA-6719-01	CMS4	MSI-L	unknown	stage II	Alive	NRC3	gene cluster B		0	435
TCGA-AA-3713-01	CMS3	MSI-H	unknown	stage IV	Alive	NRC3	gene cluster B		0	579
TCGA-AA-3524-01	CMS2	MSS	NO	stage II	Alive	NRC3	gene cluster C		0	1096
TCGA-WS-AB45-01	CMS4	MSI-H	NO	stage II	Alive	NRC3	gene cluster C		0	2130
TCGA-F4-6856-01	CMS3	MSI-H	NO	stage I	Alive	NRC3	gene cluster C		0	1074
TCGA-AA-3556-01	CMS3	MSS	NO	stage I	Alive	NRC3	gene cluster C		0	700
TCGA-AA-3956-01	CMS2	MSS	NO	stage II	Dead	NRC3	gene cluster C		0	1035
TCGA-AA-3966-01	CMS1	MSI-H	YES	stage II	Dead	NRC3	gene cluster B		0	61
TCGA-D5-6541-01	CMS4	MSS	NO	stage II	Alive	NRC3	gene cluster C		0	474
TCGA-AH-6544-01	CMS3	MSS	unknown	unknown	Dead	NRC3	gene cluster C		0	1173
TCGA-AG-A02N-01	CMS3	MSI-H	YES	unknown	Dead	NRC3	gene cluster C		0	1885
TCGA-EF-5831-01	CMS2	MSS	unknown	unknown	Dead	NRC3	gene cluster C		0	127
TCGA-AG-3598-01	CMS2	MSS	NO	unknown	Alive	NRC3	gene cluster B		0	1522
TCGA-G5-6572-01	CMS4	unknown	NO	unknown	Alive	NRC3	gene cluster C		1	1432
TCGA-AH-6644-01	CMS4	MSI-L	NO	unknown	Alive	NRC3	gene cluster C		0	838
TCGA-DC-5337-01	CMS2	MSS	NO	unknown	Alive	NRC3	gene cluster C		0	792
TCGA-DC-6683-01	CMS2	MSS	NO	unknown	Alive	NRC3	gene cluster C		0	762
TCGA-EI-6884-01	CMS3	MSS	NO	unknown	Alive	NRC3	gene cluster C		0	328
TCGA-CI-6622-01	CMS3	MSS	YES	unknown	Alive	NRC3	gene cluster C		0	1362
TCGA-CL-5917-01	CMS2	MSS	YES	unknown	Alive	NRC3	gene cluster C		0	2376
TCGA-AG-3599-01	CMS3	MSS	NO	unknown	Alive	NRC3	gene cluster B		0	366
TCGA-EI-6511-01	CMS4	MSS	YES	unknown	Alive	NRC3	gene cluster B		0	482
TCGA-F5-6702-01	CMS4	MSS	NO	unknown	Alive	NRC3	gene cluster B		1	869
TCGA-AG-3591-01	CMS3	MSS	NO	unknown	Alive	NRC3	gene cluster C		0	1035
TCGA-AF-6672-01	CMS3	MSS	YES	unknown	Alive	NRC3	gene cluster C		0	748
TCGA-AF-6655-01	CMS4	MSS	YES	unknown	Alive	NRC3	gene cluster B		0	609
TCGA-AH-6547-01	CMS4	MSS	NO	unknown	Alive	NRC3	gene cluster C		1	76
TCGA-DC-6160-01	CMS3	MSS	NO	unknown	Alive	NRC3	gene cluster C		0	1339
TCGA-AG-3892-01	CMS3	MSS	unknown	unknown	Alive	NRC3	gene cluster C		0	396
TCGA-AF-5654-01	CMS2	unknown	NO	unknown	Alive	NRC3	gene cluster C		1	512
TCGA-F5-6465-01	CMS4	MSS	NO	unknown	Alive	NRC3	gene cluster C		0	1506
TCGA-AF-3911-01	CMS2	MSI-L	YES	unknown	Dead	NRC3	gene cluster B		0	1148
TCGA-F5-6861-01	CMS2	MSS	NO	unknown	Alive	NRC3	gene cluster B		0	1160
TCGA-G5-6641-01	CMS3	MSS	NO	unknown	Alive	NRC3	gene cluster C		0	804
TCGA-EF-5830-01	CMS2	MSS	NO	unknown	Alive	NRC3	gene cluster C		0	106
TCGA-F5-6814-01	CMS1	MSS	NO	unknown	Dead	NRC3	gene cluster C		0	1131
TCGA-DC-6682-01	CMS2	MSS	NO	unknown	Alive	NRC3	gene cluster C		0	762
TCGA-DC-6158-01	CMS4	MSS	NO	unknown	Alive	NRC3	gene cluster C		1	334
TCGA-AH-6549-01	CMS2	MSI-L	unknown	unknown	Alive	NRC3	gene cluster C		0	532
TCGA-AF-3400-01	CMS4	MSS	NO	unknown	Alive	NRC3	gene cluster B		0	1049
TCGA-AG-3901-01	CMS4	MSS	YES	unknown	Alive	NRC3	gene cluster C		0	761
TCGA-AF-4110-01	CMS4	MSS	YES	unknown	Alive	NRC3	gene cluster C		0	912
TCGA-EI-6506-01	CMS3	MSS	NO	unknown	Alive	NRC3	gene cluster B		0	625
TCGA-AG-3575-01	CMS4	MSS	NO	unknown	Alive	NRC3	gene cluster C		0	365
TCGA-AG-A015-01	CMS3	MSS	NO	unknown	Alive	NRC3	gene cluster B		0	1096
TCGA-AF-2690-01	CMS4	MSS	YES	unknown	Alive	NRC3	gene cluster C		1	524
TCGA-F5-6813-01	CMS4	MSS	NO	unknown	Alive	NRC3	gene cluster B		1	598
TCGA-EI-6885-01	CMS4	MSS	YES	unknown	Alive	NRC3	gene cluster B		0	415
TCGA-AG-3594-01	CMS3	MSS	NO	unknown	Alive	NRC3	gene cluster B		1	61
TCGA-EI-6510-01	CMS3	MSI-L	NO	unknown	Alive	NRC3	gene cluster C		0	556
TCGA-AF-2687-01	CMS4	MSS	YES	unknown	Alive	NRC3	gene cluster C		0	1427
TCGA-DC-6156-01	CMS4	MSS	YES	unknown	Alive	NRC3	gene cluster C		0	943
TCGA-DC-4745-01	CMS2	MSS	NO	unknown	Alive	NRC3	gene cluster C		0	639
TCGA-AF-2693-01	CMS3	MSS	NO	unknown	Alive	NRC3	gene cluster C		0	1155
TCGA-DC-6681-01	CMS4	MSS	YES	unknown	Alive	NRC3	gene cluster C		0	790
TCGA-G5-6235-01	CMS3	MSS	NO	unknown	Dead	NRC3	gene cluster C		0	1696
TCGA-CI-6621-01	CMS2	MSS	unknown	unknown	Alive	NRC3	gene cluster C		0	419
TCGA-AH-6903-01	CMS3	MSS	NO	unknown	Alive	NRC3	gene cluster C		0	592
TCGA-AG-3742-01	CMS2	MSS	unknown	unknown	Alive	NRC3	gene cluster B		0	30
TCGA-AH-6643-01	CMS1	MSS	NO	unknown	Alive	NRC3	gene cluster B		1	1314
TCGA-EI-7004-01	CMS4	MSS	YES	unknown	Alive	NRC3	gene cluster C		0	257
TCGA-F5-6811-01	CMS4	MSI-L	NO	unknown	Alive	NRC3	gene cluster C		0	979
TCGA-F5-6464-01	CMS4	MSS	NO	unknown	Alive	NRC3	gene cluster B		1	303
TCGA-EI-6882-01	CMS3	MSI-H	NO	unknown	Alive	NRC3	gene cluster C		0	262
TCGA-EI-6514-01	CMS4	MSS	NO	unknown	Alive	NRC3	gene cluster C		0	496
TCGA-EI-6917-01	CMS4	MSS	NO	unknown	Dead	NRC3	gene cluster C		0	531
TCGA-AG-3731-01	CMS4	MSI-L	unknown	unknown	Alive	NRC3	gene cluster C		0	1126
TCGA-DC-5869-01	CMS2	MSS	NO	unknown	Alive	NRC3	gene cluster C		0	943
TCGA-AH-6897-01	CMS2	MSI-L	NO	unknown	Alive	NRC3	gene cluster C		0	804

## Sheet: GSE14333
Table S1. Basic information of bulk databases (TCGA, GSE33133, GSE14333, GSE39582 and GSE37892)
samples	RFS (days)	RFS.event	dataset	consensus cluster	Stage	dataset
GSM358341	109.2	0	GSE14333	NRC2	stage I	GEO
GSM358342	435.9	1	GSE14333	NRC3	stage I	GEO
GSM358343	494.1	0	GSE14333	NRC1	stage I	GEO
GSM358344	592.5	0	GSE14333	NRC1	stage I	GEO
GSM358345	600.6	0	GSE14333	NRC1	stage I	GEO
GSM358346	718.8	0	GSE14333	NRC1	stage I	GEO
GSM358347	810.6	1	GSE14333	NRC2	stage I	GEO
GSM358348	868.8	0	GSE14333	NRC2	stage I	GEO
GSM358349	1313.7	0	GSE14333	NRC2	stage I	GEO
GSM358350	1567.2	0	GSE14333	NRC2	stage I	GEO
GSM358351	1653.9	0	GSE14333	NRC3	stage I	GEO
GSM358352	1733.7	0	GSE14333	NRC2	stage I	GEO
GSM358353	1785.9	0	GSE14333	NRC2	stage I	GEO
GSM358354	1923	0	GSE14333	NRC2	stage I	GEO
GSM358355	1931.1	0	GSE14333	NRC2	stage I	GEO
GSM358356	1976.4	0	GSE14333	NRC2	stage I	GEO
GSM358357	2015.7	0	GSE14333	NRC2	stage I	GEO
GSM358358	2034.6	0	GSE14333	NRC2	stage I	GEO
GSM358359	2055.3	0	GSE14333	NRC3	stage I	GEO
GSM358360	2282.1	0	GSE14333	NRC2	stage I	GEO
GSM358361	2468.7	0	GSE14333	NRC2	stage I	GEO
GSM358362	2508	0	GSE14333	NRC2	stage I	GEO
GSM358363	2511.9	0	GSE14333	NRC2	stage I	GEO
GSM358364	2523.9	0	GSE14333	NRC3	stage I	GEO
GSM358365	3276.3	0	GSE14333	NRC2	stage I	GEO
GSM358366	3576.3	0	GSE14333	NRC2	stage I	GEO
GSM358367	3681.6	0	GSE14333	NRC2	stage I	GEO
GSM358368	4276.5	0	GSE14333	NRC1	stage I	GEO
GSM358370	684	0	GSE14333	NRC2	stage I	GEO
GSM358371	432	0	GSE14333	NRC2	stage I	GEO
GSM358373	1632	0	GSE14333	NRC2	stage I	GEO
GSM358374	1935	0	GSE14333	NRC3	stage I	GEO
GSM358375	54	0	GSE14333	NRC2	stage I	GEO
GSM358376	1260	0	GSE14333	NRC2	stage I	GEO
GSM358377	1695	0	GSE14333	NRC2	stage I	GEO
GSM358378	1089	0	GSE14333	NRC2	stage I	GEO
GSM358380	1326	0	GSE14333	NRC2	stage I	GEO
GSM358381	1563	0	GSE14333	NRC2	stage I	GEO
GSM358382	900	0	GSE14333	NRC2	stage I	GEO
GSM358383	1317	0	GSE14333	NRC2	stage I	GEO
GSM358384	2424	0	GSE14333	NRC2	stage I	GEO
GSM358385	67.8	0	GSE14333	NRC3	stage II	GEO
GSM358386	180.3	1	GSE14333	NRC2	stage II	GEO
GSM358387	298.8	1	GSE14333	NRC1	stage II	GEO
GSM358388	423.9	1	GSE14333	NRC3	stage II	GEO
GSM358389	427.8	1	GSE14333	NRC2	stage II	GEO
GSM358390	451.5	0	GSE14333	NRC1	stage II	GEO
GSM358391	471.3	0	GSE14333	NRC2	stage II	GEO
GSM358392	538.5	0	GSE14333	NRC3	stage II	GEO
GSM358393	545.4	0	GSE14333	NRC2	stage II	GEO
GSM358394	580.8	1	GSE14333	NRC1	stage II	GEO
GSM358395	660.6	0	GSE14333	NRC3	stage II	GEO
GSM358396	671.4	1	GSE14333	NRC1	stage II	GEO
GSM358397	671.4	1	GSE14333	NRC1	stage II	GEO
GSM358398	725.7	0	GSE14333	NRC2	stage II	GEO
GSM358399	756.3	1	GSE14333	NRC2	stage II	GEO
GSM358400	757.2	0	GSE14333	NRC1	stage II	GEO
GSM358401	768.3	0	GSE14333	NRC2	stage II	GEO
GSM358402	795.9	0	GSE14333	NRC1	stage II	GEO
GSM358403	799.8	0	GSE14333	NRC3	stage II	GEO
GSM358404	804.6	0	GSE14333	NRC3	stage II	GEO
GSM358405	814.5	0	GSE14333	NRC1	stage II	GEO
GSM358406	829.2	1	GSE14333	NRC2	stage II	GEO
GSM358407	858.9	0	GSE14333	NRC1	stage II	GEO
GSM358408	865.8	0	GSE14333	NRC2	stage II	GEO
GSM358409	876.6	0	GSE14333	NRC1	stage II	GEO
GSM358410	931.8	0	GSE14333	NRC2	stage II	GEO
GSM358411	996	0	GSE14333	NRC1	stage II	GEO
GSM358412	1010.7	0	GSE14333	NRC3	stage II	GEO
GSM358413	1077	0	GSE14333	NRC3	stage II	GEO
GSM358414	1102.5	0	GSE14333	NRC2	stage II	GEO
GSM358415	1119.3	1	GSE14333	NRC3	stage II	GEO
GSM358416	1119.3	0	GSE14333	NRC1	stage II	GEO
GSM358417	1177.5	0	GSE14333	NRC3	stage II	GEO
GSM358418	1349.1	0	GSE14333	NRC2	stage II	GEO
GSM358419	1401.3	0	GSE14333	NRC1	stage II	GEO
GSM358420	1435.8	0	GSE14333	NRC1	stage II	GEO
GSM358421	1495.2	0	GSE14333	NRC1	stage II	GEO
GSM358422	1564.2	0	GSE14333	NRC2	stage II	GEO
GSM358423	1575	0	GSE14333	NRC2	stage II	GEO
GSM358424	1659.9	0	GSE14333	NRC2	stage II	GEO
GSM358425	1677.6	0	GSE14333	NRC3	stage II	GEO
GSM358426	1740.6	0	GSE14333	NRC1	stage II	GEO
GSM358427	1788	0	GSE14333	NRC3	stage II	GEO
GSM358428	1798.8	0	GSE14333	NRC1	stage II	GEO
GSM358429	1897.5	0	GSE14333	NRC2	stage II	GEO
GSM358430	1945.8	0	GSE14333	NRC2	stage II	GEO
GSM358431	2119.5	0	GSE14333	NRC1	stage II	GEO
GSM358432	2281.2	0	GSE14333	NRC2	stage II	GEO
GSM358433	2373.9	0	GSE14333	NRC2	stage II	GEO
GSM358434	2407.5	0	GSE14333	NRC2	stage II	GEO
GSM358435	2558.4	0	GSE14333	NRC1	stage II	GEO
GSM358436	2592.9	0	GSE14333	NRC1	stage II	GEO
GSM358437	2669.7	0	GSE14333	NRC2	stage II	GEO
GSM358438	2809.8	1	GSE14333	NRC3	stage II	GEO
GSM358439	3208.2	0	GSE14333	NRC2	stage II	GEO
GSM358440	3323.7	0	GSE14333	NRC2	stage II	GEO
GSM358441	3557.4	0	GSE14333	NRC2	stage II	GEO
GSM358442	363	0	GSE14333	NRC2	stage II	GEO
GSM358443	888	0	GSE14333	NRC2	stage II	GEO
GSM358444	1110	0	GSE14333	NRC2	stage II	GEO
GSM358445	855	0	GSE14333	NRC2	stage II	GEO
GSM358446	1689	0	GSE14333	NRC1	stage II	GEO
GSM358447	1422	0	GSE14333	NRC3	stage II	GEO
GSM358448	405	0	GSE14333	NRC2	stage II	GEO
GSM358449	1704	0	GSE14333	NRC2	stage II	GEO
GSM358450	1584	0	GSE14333	NRC2	stage II	GEO
GSM358451	1359	0	GSE14333	NRC2	stage II	GEO
GSM358452	1671	0	GSE14333	NRC2	stage II	GEO
GSM358453	1200	0	GSE14333	NRC2	stage II	GEO
GSM358454	426	1	GSE14333	NRC2	stage II	GEO
GSM358455	123	0	GSE14333	NRC2	stage II	GEO
GSM358456	1785	0	GSE14333	NRC2	stage II	GEO
GSM358457	1287	0	GSE14333	NRC2	stage II	GEO
GSM358458	978	1	GSE14333	NRC2	stage II	GEO
GSM358459	939	0	GSE14333	NRC2	stage II	GEO
GSM358460	1017	0	GSE14333	NRC1	stage II	GEO
GSM358461	1431	0	GSE14333	NRC2	stage II	GEO
GSM358462	1146	0	GSE14333	NRC3	stage II	GEO
GSM358463	1332	0	GSE14333	NRC2	stage II	GEO
GSM358464	1344	0	GSE14333	NRC2	stage II	GEO
GSM358465	1710	0	GSE14333	NRC2	stage II	GEO
GSM358466	1212	0	GSE14333	NRC2	stage II	GEO
GSM358467	156	0	GSE14333	NRC1	stage II	GEO
GSM358468	348	0	GSE14333	NRC3	stage II	GEO
GSM358469	1752	0	GSE14333	NRC2	stage II	GEO
GSM358470	1086	0	GSE14333	NRC2	stage II	GEO
GSM358471	1362	0	GSE14333	NRC1	stage II	GEO
GSM358472	1527	0	GSE14333	NRC1	stage II	GEO
GSM358473	1677	0	GSE14333	NRC2	stage II	GEO
GSM358474	429	1	GSE14333	NRC2	stage II	GEO
GSM358475	1014	0	GSE14333	NRC1	stage II	GEO
GSM358476	1140	0	GSE14333	NRC2	stage II	GEO
GSM358477	2226	0	GSE14333	NRC3	stage II	GEO
GSM358478	2547	0	GSE14333	NRC3	stage II	GEO
GSM358479	27.6	0	GSE14333	NRC1	stage III	GEO
GSM358480	47.1	1	GSE14333	NRC2	stage III	GEO
GSM358481	99.6	1	GSE14333	NRC1	stage III	GEO
GSM358482	127.2	0	GSE14333	NRC2	stage III	GEO
GSM358483	156.6	0	GSE14333	NRC2	stage III	GEO
GSM358484	160.5	1	GSE14333	NRC2	stage III	GEO
GSM358485	246.3	1	GSE14333	NRC2	stage III	GEO
GSM358486	249.3	1	GSE14333	NRC2	stage III	GEO
GSM358487	257.4	1	GSE14333	NRC3	stage III	GEO
GSM358488	286.8	1	GSE14333	NRC1	stage III	GEO
GSM358489	357	1	GSE14333	NRC2	stage III	GEO
GSM358490	441.6	1	GSE14333	NRC2	stage III	GEO
GSM358491	482.1	1	GSE14333	NRC3	stage III	GEO
GSM358492	567.9	1	GSE14333	NRC3	stage III	GEO
GSM358493	568.8	0	GSE14333	NRC3	stage III	GEO
GSM358494	599.4	0	GSE14333	NRC1	stage III	GEO
GSM358495	613.2	0	GSE14333	NRC2	stage III	GEO
GSM358496	631.2	1	GSE14333	NRC1	stage III	GEO
GSM358497	638.1	1	GSE14333	NRC3	stage III	GEO
GSM358498	667.5	0	GSE14333	NRC2	stage III	GEO
GSM358499	700.2	1	GSE14333	NRC1	stage III	GEO
GSM358500	723.9	1	GSE14333	NRC3	stage III	GEO
GSM358501	745.5	1	GSE14333	NRC3	stage III	GEO
GSM358502	787.8	0	GSE14333	NRC3	stage III	GEO
GSM358503	807.6	0	GSE14333	NRC1	stage III	GEO
GSM358504	827.4	1	GSE14333	NRC1	stage III	GEO
GSM358505	832.2	1	GSE14333	NRC1	stage III	GEO
GSM358506	881.7	1	GSE14333	NRC2	stage III	GEO
GSM358507	940.8	0	GSE14333	NRC3	stage III	GEO
GSM358508	957.6	0	GSE14333	NRC1	stage III	GEO
GSM358509	1025.7	1	GSE14333	NRC3	stage III	GEO
GSM358510	1107.6	1	GSE14333	NRC3	stage III	GEO
GSM358511	1107.6	0	GSE14333	NRC2	stage III	GEO
GSM358512	1142.1	0	GSE14333	NRC2	stage III	GEO
GSM358513	1161.6	0	GSE14333	NRC1	stage III	GEO
GSM358514	1231.8	1	GSE14333	NRC3	stage III	GEO
GSM358515	1340.1	0	GSE14333	NRC1	stage III	GEO
GSM358516	1342.2	0	GSE14333	NRC1	stage III	GEO
GSM358517	1434	0	GSE14333	NRC2	stage III	GEO
GSM358518	1473.3	0	GSE14333	NRC2	stage III	GEO
GSM358519	1512.9	0	GSE14333	NRC2	stage III	GEO
GSM358520	1517.7	0	GSE14333	NRC3	stage III	GEO
GSM358521	1585.8	0	GSE14333	NRC2	stage III	GEO
GSM358522	1647	0	GSE14333	NRC2	stage III	GEO
GSM358523	1753.5	0	GSE14333	NRC2	stage III	GEO
GSM358524	1772.1	0	GSE14333	NRC3	stage III	GEO
GSM358525	1780.2	0	GSE14333	NRC3	stage III	GEO
GSM358526	1929.9	0	GSE14333	NRC1	stage III	GEO
GSM358527	1947.9	0	GSE14333	NRC3	stage III	GEO
GSM358528	1966.5	0	GSE14333	NRC2	stage III	GEO
GSM358529	2162.7	0	GSE14333	NRC3	stage III	GEO
GSM358530	2230.8	0	GSE14333	NRC2	stage III	GEO
GSM358531	2235.9	0	GSE14333	NRC1	stage III	GEO
GSM358532	2383.8	1	GSE14333	NRC3	stage III	GEO
GSM358533	2568.3	0	GSE14333	NRC1	stage III	GEO
GSM358534	2575.2	1	GSE14333	NRC1	stage III	GEO
GSM358535	2688.6	0	GSE14333	NRC2	stage III	GEO
GSM358536	2852.1	0	GSE14333	NRC3	stage III	GEO
GSM358537	2985.3	0	GSE14333	NRC1	stage III	GEO
GSM358538	3155.1	0	GSE14333	NRC3	stage III	GEO
GSM358539	3369.9	0	GSE14333	NRC1	stage III	GEO
GSM358540	927	0	GSE14333	NRC2	stage III	GEO
GSM358541	720	0	GSE14333	NRC3	stage III	GEO
GSM358542	948	0	GSE14333	NRC2	stage III	GEO
GSM358543	1488	0	GSE14333	NRC1	stage III	GEO
GSM358544	456	1	GSE14333	NRC2	stage III	GEO
GSM358545	726	0	GSE14333	NRC2	stage III	GEO
GSM358546	2073	0	GSE14333	NRC3	stage III	GEO
GSM358547	2043	0	GSE14333	NRC2	stage III	GEO
GSM358548	309	1	GSE14333	NRC2	stage III	GEO
GSM358549	1776	0	GSE14333	NRC2	stage III	GEO
GSM358550	1842	0	GSE14333	NRC2	stage III	GEO
GSM358551	450	0	GSE14333	NRC2	stage III	GEO
GSM358552	1734	0	GSE14333	NRC2	stage III	GEO
GSM358553	564	0	GSE14333	NRC3	stage III	GEO
GSM358554	135	1	GSE14333	NRC2	stage III	GEO
GSM358555	1143	1	GSE14333	NRC2	stage III	GEO
GSM358556	1212	0	GSE14333	NRC2	stage III	GEO
GSM358557	171	1	GSE14333	NRC2	stage III	GEO
GSM358558	306	0	GSE14333	NRC2	stage III	GEO
GSM358559	2541	0	GSE14333	NRC2	stage III	GEO
GSM358560	507	0	GSE14333	NRC2	stage III	GEO
GSM358561	285	1	GSE14333	NRC2	stage III	GEO
GSM358562	2061	0	GSE14333	NRC2	stage III	GEO
GSM358563	1785	0	GSE14333	NRC3	stage III	GEO
GSM358564	561	0	GSE14333	NRC1	stage III	GEO
GSM358565	2124	0	GSE14333	NRC2	stage III	GEO
GSM358566	133.2	1	GSE14333	NRC2	stage III	GEO
GSM358567	1200	1	GSE14333	NRC3	stage III	GEO
GSM358568	2187	1	GSE14333	NRC3	stage III	GEO
GSM358569	540	1	GSE14333	NRC2	stage III	GEO

## Sheet: GSE33133
Table S1. Basic information of bulk databases (TCGA, GSE33133, GSE14333, GSE39582 and GSE37892)
samples	RFS (days)	RFS.event	dataset	consensus cluster	Stage	dataset
GSM820048	2000	0	GSE33113	NRC1	stage II	GEO
GSM820049	140	0	GSE33113	NRC2	stage II	GEO
GSM820050	62	0	GSE33113	NRC2	stage II	GEO
GSM820051	832	1	GSE33113	NRC2	stage II	GEO
GSM820052	1175	0	GSE33113	NRC2	stage II	GEO
GSM820053	1541	0	GSE33113	NRC2	stage II	GEO
GSM820054	1613	0	GSE33113	NRC2	stage II	GEO
GSM820055	748	0	GSE33113	NRC3	stage II	GEO
GSM820056	1545	0	GSE33113	NRC2	stage II	GEO
GSM820057	1175	0	GSE33113	NRC2	stage II	GEO
GSM820058	657	1	GSE33113	NRC1	stage II	GEO
GSM820059	1137	0	GSE33113	NRC3	stage II	GEO
GSM820060	499	0	GSE33113	NRC2	stage II	GEO
GSM820061	1470	0	GSE33113	NRC1	stage II	GEO
GSM820062	1433	0	GSE33113	NRC2	stage II	GEO
GSM820063	2810	0	GSE33113	NRC2	stage II	GEO
GSM820064	2868	0	GSE33113	NRC2	stage II	GEO
GSM820065	1774	0	GSE33113	NRC1	stage II	GEO
GSM820066	1928	0	GSE33113	NRC2	stage II	GEO
GSM820067	1060	1	GSE33113	NRC2	stage II	GEO
GSM820068	929	0	GSE33113	NRC2	stage II	GEO
GSM820069	3550	0	GSE33113	NRC2	stage II	GEO
GSM820070	1329	0	GSE33113	NRC1	stage II	GEO
GSM820071	204	1	GSE33113	NRC2	stage II	GEO
GSM820072	357	1	GSE33113	NRC3	stage II	GEO
GSM820073	994	0	GSE33113	NRC2	stage II	GEO
GSM820074	1413	0	GSE33113	NRC1	stage II	GEO
GSM820075	2157	0	GSE33113	NRC2	stage II	GEO
GSM820076	1977	0	GSE33113	NRC3	stage II	GEO
GSM820077	1807	0	GSE33113	NRC1	stage II	GEO
GSM820078	446	0	GSE33113	NRC1	stage II	GEO
GSM820079	1859	0	GSE33113	NRC2	stage II	GEO
GSM820080	2273	0	GSE33113	NRC2	stage II	GEO
GSM820081	1959	0	GSE33113	NRC2	stage II	GEO
GSM820082	1278	1	GSE33113	NRC2	stage II	GEO
GSM820083	269	1	GSE33113	NRC3	stage II	GEO
GSM820084	3555	0	GSE33113	NRC1	stage II	GEO
GSM820085	3599	0	GSE33113	NRC1	stage II	GEO
GSM820086	974	0	GSE33113	NRC1	stage II	GEO
GSM820087	1473	0	GSE33113	NRC2	stage II	GEO
GSM820088	446	1	GSE33113	NRC3	stage II	GEO
GSM820089	236	0	GSE33113	NRC2	stage II	GEO
GSM820090	332	1	GSE33113	NRC3	stage II	GEO
GSM820091	437	1	GSE33113	NRC3	stage II	GEO
GSM820092	438	1	GSE33113	NRC1	stage II	GEO
GSM820093	1006	0	GSE33113	NRC1	stage II	GEO
GSM820094	803	0	GSE33113	NRC1	stage II	GEO
GSM820095	2414	0	GSE33113	NRC1	stage II	GEO
GSM820096	1174	0	GSE33113	NRC1	stage II	GEO
GSM820097	391	1	GSE33113	NRC1	stage II	GEO
GSM820098	3065	0	GSE33113	NRC2	stage II	GEO
GSM820099	474	0	GSE33113	NRC3	stage II	GEO
GSM820100	457	0	GSE33113	NRC2	stage II	GEO
GSM820101	1260	0	GSE33113	NRC2	stage II	GEO
GSM820102	54	0	GSE33113	NRC3	stage II	GEO
GSM820103	1983	0	GSE33113	NRC2	stage II	GEO
GSM820104	1667	0	GSE33113	NRC3	stage II	GEO
GSM820105	2141	0	GSE33113	NRC2	stage II	GEO
GSM820106	1281	0	GSE33113	NRC2	stage II	GEO
GSM820107	409	1	GSE33113	NRC3	stage II	GEO
GSM820108	56	0	GSE33113	NRC1	stage II	GEO
GSM820109	1640	0	GSE33113	NRC3	stage II	GEO
GSM820110	971	0	GSE33113	NRC2	stage II	GEO
GSM820111	1189	0	GSE33113	NRC1	stage II	GEO
GSM820112	1184	0	GSE33113	NRC3	stage II	GEO
GSM820113	1785	0	GSE33113	NRC2	stage II	GEO
GSM820114	1837	0	GSE33113	NRC3	stage II	GEO
GSM820115	1844	0	GSE33113	NRC2	stage II	GEO
GSM820116	273	1	GSE33113	NRC3	stage II	GEO
GSM820117	538	1	GSE33113	NRC3	stage II	GEO
GSM820118	1608	0	GSE33113	NRC2	stage II	GEO
GSM820119	634	1	GSE33113	NRC3	stage II	GEO
GSM820120	736	0	GSE33113	NRC1	stage II	GEO
GSM820121	1378	0	GSE33113	NRC3	stage II	GEO
GSM820122	1582	0	GSE33113	NRC1	stage II	GEO
GSM820123	447	1	GSE33113	NRC1	stage II	GEO
GSM820124	1296	0	GSE33113	NRC2	stage II	GEO
GSM820125	893	0	GSE33113	NRC1	stage II	GEO
GSM820126	1219	0	GSE33113	NRC2	stage II	GEO
GSM820127	200	1	GSE33113	NRC3	stage II	GEO
GSM820128	1319	0	GSE33113	NRC2	stage II	GEO
GSM820129	344	0	GSE33113	NRC1	stage II	GEO
GSM820130	1230	0	GSE33113	NRC1	stage II	GEO
GSM820131	1147	0	GSE33113	NRC1	stage II	GEO
GSM820132	1042	0	GSE33113	NRC1	stage II	GEO
GSM820133	1094	0	GSE33113	NRC1	stage II	GEO
GSM820134	1061	0	GSE33113	NRC2	stage II	GEO
GSM820135	50	1	GSE33113	NRC3	stage II	GEO
GSM820136	1431	0	GSE33113	NRC2	stage II	GEO
GSM820137	1428	0	GSE33113	NRC2	stage II	GEO

## Sheet: GSE39582
Table S1. Basic information of bulk databases (TCGA, GSE33133, GSE14333, GSE39582 and GSE37892)
	RFS (days)	RFS.event	dataset	consensus cluster	Stage	dataset	molecular subtype
GSM971957	0	1	GSE39582	NRC2	stage IV	GEO	CINWntUp
GSM971958	0	1	GSE39582	NRC3	stage IV	GEO	CSC
GSM971959	120	1	GSE39582	NRC2	stage II	GEO	KRASm
GSM971960	2220	0	GSE39582	NRC2	stage I	GEO	CINImmuneDown
GSM971961	30	1	GSE39582	NRC3	stage IV	GEO	CSC
GSM971962	2190	0	GSE39582	NRC3	stage III	GEO	CSC
GSM971963	510	1	GSE39582	NRC3	stage II	GEO	dMMR
GSM971964	1050	0	GSE39582	NRC2	stage III	GEO	CINImmuneDown
GSM971965	990	0	GSE39582	NRC3	stage II	GEO	CINImmuneDown
GSM971966	1890	0	GSE39582	NRC2	stage III	GEO	CINWntUp
GSM971968	2790	1	GSE39582	NRC3	stage II	GEO	CSC
GSM971969	1890	0	GSE39582	NRC2	stage I	GEO	dMMR
GSM971970	2580	0	GSE39582	NRC2	stage I	GEO	KRASm
GSM971971	1950	0	GSE39582	NRC3	stage IV	GEO	dMMR
GSM971972	2250	0	GSE39582	NRC2	stage I	GEO	CINImmuneDown
GSM971973	1380	0	GSE39582	NRC2	stage II	GEO	CINWntUp
GSM971974	1680	0	GSE39582	NRC2	stage IV	GEO	KRASm
GSM971975	1380	0	GSE39582	NRC2	stage II	GEO	CINImmuneDown
GSM971976	1080	0	GSE39582	NRC2	stage II	GEO	CINWntUp
GSM971977	1470	0	GSE39582	NRC3	stage III	GEO	dMMR
GSM971978	3270	0	GSE39582	NRC2	stage I	GEO	dMMR
GSM971979	1590	0	GSE39582	NRC3	stage II	GEO	dMMR
GSM971980	1770	0	GSE39582	NRC3	stage III	GEO	dMMR
GSM971981	1440	0	GSE39582	NRC3	stage II	GEO	dMMR
GSM971982	1260	0	GSE39582	NRC3	stage III	GEO	dMMR
GSM971983	2610	0	GSE39582	NRC3	stage III	GEO	dMMR
GSM971984	150	1	GSE39582	NRC2	stage II	GEO	dMMR
GSM971985	210	0	GSE39582	NRC2	NA	NA	KRASm
GSM971986	2040	0	GSE39582	NRC1	stage II	GEO	CINWntUp
GSM971987	2040	0	GSE39582	NRC3	stage II	GEO	CINnormL
GSM971988	450	1	GSE39582	NRC2	stage IV	GEO	dMMR
GSM971989	480	1	GSE39582	NRC2	stage I	GEO	KRASm
GSM971990	360	0	GSE39582	NRC2	stage I	GEO	KRASm
GSM971991	1650	0	GSE39582	NRC2	stage II	GEO	CINWntUp
GSM971992	600	0	GSE39582	NRC2	stage II	GEO	CINImmuneDown
GSM971993	1680	0	GSE39582	NRC2	stage II	GEO	KRASm
GSM971994	1290	0	GSE39582	NRC2	stage II	GEO	CINWntUp
GSM971995	750	0	GSE39582	NRC2	stage II	GEO	CINnormL
GSM971996	2280	0	GSE39582	NRC3	stage III	GEO	CSC
GSM971997	2670	0	GSE39582	NRC3	stage III	GEO	dMMR
GSM971998	540	1	GSE39582	NRC3	stage III	GEO	CINnormL
GSM971999	30	0	GSE39582	NRC3	stage III	GEO	CINnormL
GSM972000	270	1	GSE39582	NRC1	stage III	GEO	CINWntUp
GSM972001	2190	0	GSE39582	NRC2	stage III	GEO	CINImmuneDown
GSM972002	750	1	GSE39582	NRC2	stage III	GEO	KRASm
GSM972003	0	1	GSE39582	NRC2	stage IV	GEO	CINImmuneDown
GSM972004	2670	0	GSE39582	NRC2	stage IV	GEO	CINImmuneDown
GSM972005	0	1	GSE39582	NRC2	stage IV	GEO	KRASm
GSM972006	0	1	GSE39582	NRC3	stage IV	GEO	CINWntUp
GSM972007	60	0	GSE39582	NRC3	stage IV	GEO	CSC
GSM972008	60	1	GSE39582	NRC3	stage IV	GEO	CSC
GSM972009	0	1	GSE39582	NRC3	stage IV	GEO	CINnormL
GSM972010	300	1	GSE39582	NRC2	stage IV	GEO	CINWntUp
GSM972011	540	1	GSE39582	NRC3	stage IV	GEO	CSC
GSM972012	3030	0	GSE39582	NRC2	stage IV	GEO	KRASm
GSM972013	1290	0	GSE39582	NRC2	stage IV	GEO	CINWntUp
GSM972014	0	1	GSE39582	NRC2	stage IV	GEO	CINWntUp
GSM972015	2730	0	GSE39582	NRC2	stage II	GEO	dMMR
GSM972016	420	1	GSE39582	NRC3	stage II	GEO	dMMR
GSM972017	1290	0	GSE39582	NRC2	stage III	GEO	CINImmuneDown
GSM972018	3510	0	GSE39582	NRC2	stage III	GEO	CINWntUp
GSM972019	630	1	GSE39582	NRC3	stage III	GEO	CSC
GSM972020	270	1	GSE39582	NRC3	stage III	GEO	CINnormL
GSM972021	150	1	GSE39582	NRC2	stage III	GEO	dMMR
GSM972022	2460	0	GSE39582	NRC2	stage III	GEO	CINImmuneDown
GSM972023	180	1	GSE39582	NRC2	stage III	GEO	KRASm
GSM972024	1110	1	GSE39582	NRC2	stage III	GEO	CINImmuneDown
GSM972025	1590	0	GSE39582	NRC2	stage III	GEO	CINImmuneDown
GSM972026	960	1	GSE39582	NRC3	stage III	GEO	CSC
GSM972027	2820	0	GSE39582	NRC1	stage III	GEO	CINWntUp
GSM972028	2340	0	GSE39582	NRC1	stage III	GEO	CINnormL
GSM972029	1080	0	GSE39582	NRC1	stage III	GEO	CINnormL
GSM972030	1560	0	GSE39582	NRC1	stage III	GEO	dMMR
GSM972031	1650	0	GSE39582	NRC2	stage II	GEO	CINWntUp
GSM972032	1800	0	GSE39582	NRC2	stage II	GEO	CINWntUp
GSM972033	1500	0	GSE39582	NRC2	stage II	GEO	CINImmuneDown
GSM972034	1500	0	GSE39582	NRC2	stage II	GEO	CINImmuneDown
GSM972035	1170	0	GSE39582	NRC2	stage II	GEO	CINImmuneDown
GSM972036	1500	0	GSE39582	NRC2	stage II	GEO	KRASm
GSM972037	990	0	GSE39582	NRC2	stage II	GEO	KRASm
GSM972038	30	0	GSE39582	NRC2	stage II	GEO	CINWntUp
GSM972039	0	1	GSE39582	NRC3	stage IV	GEO	CSC
GSM972040	1890	0	GSE39582	NRC2	stage II	GEO	CINWntUp
GSM972041	1650	0	GSE39582	NRC2	stage II	GEO	CINWntUp
GSM972042	1530	0	GSE39582	NRC2	stage II	GEO	KRASm
GSM972043	0	1	GSE39582	NRC2	stage IV	GEO	CINImmuneDown
GSM972044	1260	0	GSE39582	NRC2	stage II	GEO	KRASm
GSM972045	0	1	GSE39582	NRC2	stage IV	GEO	KRASm
GSM972046	630	1	GSE39582	NRC3	stage II	GEO	CINWntUp
GSM972047	990	0	GSE39582	NRC2	stage II	GEO	CINWntUp
GSM972048	0	1	GSE39582	NRC2	stage IV	GEO	CINImmuneDown
GSM972049	780	0	GSE39582	NRC2	stage II	GEO	KRASm
GSM972050	570	0	GSE39582	NRC2	stage II	GEO	KRASm
GSM972051	0	1	GSE39582	NRC3	stage IV	GEO	CSC
GSM972052	450	0	GSE39582	NRC2	stage II	GEO	CINWntUp
GSM972053	870	0	GSE39582	NRC2	stage II	GEO	CINWntUp
GSM972054	780	0	GSE39582	NRC3	stage II	GEO	CSC
GSM972055	2790	0	GSE39582	NRC1	stage II	GEO	dMMR
GSM972056	2760	0	GSE39582	NRC1	stage II	GEO	dMMR
GSM972057	780	0	GSE39582	NRC1	stage II	GEO	CINImmuneDown
GSM972058	1800	0	GSE39582	NRC3	stage II	GEO	dMMR
GSM972059	1770	0	GSE39582	NRC1	stage II	GEO	dMMR
GSM972060	2460	0	GSE39582	NRC1	stage II	GEO	CINWntUp
GSM972061	1290	0	GSE39582	NRC1	stage II	GEO	CINImmuneDown
GSM972062	0	1	GSE39582	NRC1	stage II	GEO	CINnormL
GSM972063	2100	0	GSE39582	NRC3	stage II	GEO	CINImmuneDown
GSM972064	0	1	GSE39582	NRC3	stage IV	GEO	CSC
GSM972065	1380	0	GSE39582	NRC3	stage II	GEO	CINImmuneDown
GSM972066	0	1	GSE39582	NRC1	stage IV	GEO	CINImmuneDown
GSM972067	5490	0	GSE39582	NRC1	stage II	GEO	CINWntUp
GSM972068	90	1	GSE39582	NRC3	stage II	GEO	CSC
GSM972069	6030	0	GSE39582	NRC2	stage II	GEO	CINWntUp
GSM972070	2040	0	GSE39582	NRC3	stage II	GEO	CINnormL
GSM972071	5490	0	GSE39582	NRC2	stage II	GEO	CINWntUp
GSM972072	5160	0	GSE39582	NRC3	stage II	GEO	CSC
GSM972073	4890	0	GSE39582	NRC3	stage II	GEO	CSC
GSM972074	30	1	GSE39582	NRC1	stage II	GEO	CINImmuneDown
GSM972075	1320	0	GSE39582	NRC2	stage II	GEO	dMMR
GSM972076	4590	0	GSE39582	NRC3	stage II	GEO	dMMR
GSM972077	780	1	GSE39582	NRC1	stage II	GEO	CINnormL
GSM972078	1620	1	GSE39582	NRC1	stage II	GEO	CINWntUp
GSM972079	5040	0	GSE39582	NRC1	stage II	GEO	dMMR
GSM972080	1590	1	GSE39582	NRC3	stage II	GEO	dMMR
GSM972081	780	0	GSE39582	NRC3	stage II	GEO	CINImmuneDown
GSM972082	3570	1	GSE39582	NRC3	stage II	GEO	dMMR
GSM972083	3810	0	GSE39582	NRC1	stage II	GEO	CINWntUp
GSM972084	3870	0	GSE39582	NRC3	stage II	GEO	CINnormL
GSM972085	2910	0	GSE39582	NRC1	stage II	GEO	CINImmuneDown
GSM972086	1290	0	GSE39582	NRC2	stage II	GEO	CINImmuneDown
GSM972087	240	1	GSE39582	NRC2	stage II	GEO	CINImmuneDown
GSM972088	2370	0	GSE39582	NRC3	stage II	GEO	CINnormL
GSM972089	2610	0	GSE39582	NRC3	stage II	GEO	CSC
GSM972090	2070	0	GSE39582	NRC2	stage II	GEO	CINImmuneDown
GSM972091	1350	1	GSE39582	NRC2	stage II	GEO	KRASm
GSM972092	1410	0	GSE39582	NRC3	stage II	GEO	CINWntUp
GSM972093	2220	0	GSE39582	NRC2	stage II	GEO	CINWntUp
GSM972094	1830	0	GSE39582	NRC3	stage II	GEO	CINWntUp
GSM972095	2010	0	GSE39582	NRC2	stage II	GEO	CINWntUp
GSM972096	90	1	GSE39582	NRC2	stage III	GEO	CINImmuneDown
GSM972097	360	1	GSE39582	NRC1	stage III	GEO	CSC
GSM972098	450	0	GSE39582	NRC2	stage III	GEO	KRASm
GSM972099	450	0	GSE39582	NRC2	stage III	GEO	CINWntUp
GSM972100	750	0	GSE39582	NRC2	stage III	GEO	KRASm
GSM972101	630	1	GSE39582	NRC1	stage III	GEO	CINnormL
GSM972102	1380	0	GSE39582	NRC3	stage III	GEO	CINnormL
GSM972103	840	1	GSE39582	NRC2	stage III	GEO	dMMR
GSM972104	1230	0	GSE39582	NRC3	stage III	GEO	CSC
GSM972105	960	0	GSE39582	NRC1	stage III	GEO	CINWntUp
GSM972106	270	1	GSE39582	NRC1	stage III	GEO	CINWntUp
GSM972107	1800	0	GSE39582	NRC1	stage III	GEO	CINnormL
GSM972108	3090	0	GSE39582	NRC1	stage III	GEO	CINWntUp
GSM972109	1080	0	GSE39582	NRC2	stage III	GEO	dMMR
GSM972110	120	1	GSE39582	NRC2	stage III	GEO	KRASm
GSM972111	390	1	GSE39582	NRC1	stage III	GEO	KRASm
GSM972112	960	0	GSE39582	NRC3	stage III	GEO	CSC
GSM972113	540	1	GSE39582	NRC3	stage III	GEO	CSC
GSM972114	1380	0	GSE39582	NRC2	stage III	GEO	KRASm
GSM972115	330	1	GSE39582	NRC1	stage III	GEO	CINnormL
GSM972116	60	1	GSE39582	NRC3	stage III	GEO	CINnormL
GSM972117	330	1	GSE39582	NRC3	stage III	GEO	dMMR
GSM972118	570	1	GSE39582	NRC2	stage III	GEO	CINImmuneDown
GSM972119	750	1	GSE39582	NRC2	stage III	GEO	CINWntUp
GSM972120	1080	0	GSE39582	NRC2	stage III	GEO	CINWntUp
GSM972121	1050	0	GSE39582	NRC2	stage III	GEO	KRASm
GSM972122	570	1	GSE39582	NRC2	stage III	GEO	CINWntUp
GSM972123	2130	0	GSE39582	NRC2	stage II	GEO	CINImmuneDown
GSM972124	2250	0	GSE39582	NRC1	stage II	GEO	CINnormL
GSM972125	420	1	GSE39582	NRC1	stage II	GEO	CINnormL
GSM972126	1890	0	GSE39582	NRC2	stage II	GEO	CINWntUp
GSM972127	2550	0	GSE39582	NRC1	stage II	GEO	CINnormL
GSM972128	2790	0	GSE39582	NRC1	stage II	GEO	CINWntUp
GSM972129	330	0	GSE39582	NRC2	stage II	GEO	dMMR
GSM972130	1650	0	GSE39582	NRC2	stage II	GEO	CINWntUp
GSM972131	2580	0	GSE39582	NRC3	stage II	GEO	CSC
GSM972132	1830	0	GSE39582	NRC2	stage II	GEO	CINWntUp
GSM972133	810	1	GSE39582	NRC3	stage III	GEO	CINnormL
GSM972134	210	1	GSE39582	NRC3	stage III	GEO	CINWntUp
GSM972135	120	1	GSE39582	NRC2	stage II	GEO	KRASm
GSM972136	1830	1	GSE39582	NRC2	stage III	GEO	CINImmuneDown
GSM972137	270	1	GSE39582	NRC2	stage II	GEO	CINImmuneDown
GSM972138	1350	1	GSE39582	NRC2	stage II	GEO	CINImmuneDown
GSM972139	1140	1	GSE39582	NRC2	stage III	GEO	CINWntUp
GSM972140	1680	1	GSE39582	NRC3	stage II	GEO	CSC
GSM972141	450	1	GSE39582	NRC2	stage III	GEO	CINWntUp
GSM972142	60	1	GSE39582	NRC2	stage III	GEO	CINWntUp
GSM972143	4620	0	GSE39582	NRC2	stage II	GEO	CINWntUp
GSM972144	3630	0	GSE39582	NRC2	stage II	GEO	CINImmuneDown
GSM972145	4050	0	GSE39582	NRC2	stage III	GEO	CINnormL
GSM972146	1980	0	GSE39582	NRC3	stage III	GEO	dMMR
GSM972147	4200	0	GSE39582	NRC2	stage II	GEO	CINWntUp
GSM972148	3810	0	GSE39582	NRC2	stage III	GEO	CINWntUp
GSM972149	3960	0	GSE39582	NRC1	stage II	GEO	CINImmuneDown
GSM972150	3270	0	GSE39582	NRC2	stage III	GEO	CINnormL
GSM972151	2310	0	GSE39582	NRC2	stage III	GEO	KRASm
GSM972152	1680	0	GSE39582	NRC2	stage III	GEO	CINImmuneDown
GSM972153	1980	0	GSE39582	NRC2	stage II	GEO	CINImmuneDown
GSM972154	90	1	GSE39582	NRC2	stage III	GEO	CINImmuneDown
GSM972155	180	1	GSE39582	NRC2	stage III	GEO	CINImmuneDown
GSM972156	3360	0	GSE39582	NRC1	stage III	GEO	CINnormL
GSM972157	3540	0	GSE39582	NRC2	stage III	GEO	CINWntUp
GSM972158	3600	0	GSE39582	NRC3	stage III	GEO	CSC
GSM972159	2790	0	GSE39582	NRC2	stage III	GEO	KRASm
GSM972160	1170	1	GSE39582	NRC2	stage II	GEO	CINWntUp
GSM972161	270	1	GSE39582	NRC2	stage II	GEO	CINImmuneDown
GSM972162	2310	0	GSE39582	NRC3	stage III	GEO	CINWntUp
GSM972163	1230	0	GSE39582	NRC3	stage II	GEO	CINnormL
GSM972164	90	1	GSE39582	NRC2	stage III	GEO	CINWntUp
GSM972165	1080	1	GSE39582	NRC3	stage II	GEO	CINnormL
GSM972166	90	1	GSE39582	NRC2	stage III	GEO	CINImmuneDown
GSM972167	1080	1	GSE39582	NRC2	stage II	GEO	CINWntUp
GSM972168	120	1	GSE39582	NRC3	stage III	GEO	dMMR
GSM972169	4920	0	GSE39582	NRC2	stage II	GEO	CINImmuneDown
GSM972170	2190	0	GSE39582	NRC2	stage III	GEO	CINWntUp
GSM972171	3900	0	GSE39582	NRC3	stage III	GEO	dMMR
GSM972172	120	1	GSE39582	NRC1	stage II	GEO	dMMR
GSM972173	450	1	GSE39582	NRC1	stage II	GEO	CINImmuneDown
GSM972174	2910	0	GSE39582	NRC1	stage III	GEO	CINnormL
GSM972175	840	1	GSE39582	NRC1	stage III	GEO	CINImmuneDown
GSM972176	1050	1	GSE39582	NRC1	stage III	GEO	CINWntUp
GSM972177	600	1	GSE39582	NRC1	stage II	GEO	CINnormL
GSM972178	630	1	GSE39582	NRC1	stage III	GEO	KRASm
GSM972179	510	1	GSE39582	NRC1	stage II	GEO	CINWntUp
GSM972180	570	1	GSE39582	NRC1	stage II	GEO	dMMR
GSM972181	390	1	GSE39582	NRC1	stage III	GEO	CSC
GSM972182	690	1	GSE39582	NRC1	stage II	GEO	CINImmuneDown
GSM972183	330	1	GSE39582	NRC1	stage III	GEO	KRASm
GSM972184	120	1	GSE39582	NRC3	stage II	GEO	CSC
GSM972185	660	1	GSE39582	NRC1	stage III	GEO	CINImmuneDown
GSM972186	420	1	GSE39582	NRC1	stage III	GEO	CSC
GSM972187	270	1	GSE39582	NRC1	stage II	GEO	dMMR
GSM972188	330	1	GSE39582	NRC1	stage III	GEO	CINImmuneDown
GSM972189	5760	0	GSE39582	NRC2	stage III	GEO	dMMR
GSM972190	3240	0	GSE39582	NRC1	stage II	GEO	CINWntUp
GSM972191	3660	0	GSE39582	NRC2	stage III	GEO	KRASm
GSM972192	4740	0	GSE39582	NRC1	stage II	GEO	dMMR
GSM972193	2190	0	GSE39582	NRC1	stage III	GEO	CINImmuneDown
GSM972194	2490	0	GSE39582	NRC1	stage III	GEO	CINImmuneDown
GSM972195	3600	0	GSE39582	NRC1	stage II	GEO	KRASm
GSM972196	2190	0	GSE39582	NRC2	stage II	GEO	dMMR
GSM972197	1500	0	GSE39582	NRC1	stage II	GEO	KRASm
GSM972198	1710	0	GSE39582	NRC1	stage III	GEO	CINImmuneDown
GSM972199	1980	0	GSE39582	NRC1	stage III	GEO	CINImmuneDown
GSM972200	1620	0	GSE39582	NRC1	stage II	GEO	CINnormL
GSM972201	2010	0	GSE39582	NRC3	stage III	GEO	CINWntUp
GSM972202	1590	0	GSE39582	NRC1	stage III	GEO	CINImmuneDown
GSM972203	1620	0	GSE39582	NRC1	stage III	GEO	CINImmuneDown
GSM972204	120	1	GSE39582	NRC3	stage II	GEO	CINWntUp
GSM972205	210	1	GSE39582	NRC2	stage II	GEO	CINWntUp
GSM972206	0	1	GSE39582	NRC1	stage II	GEO	CINnormL
GSM972207	1020	1	GSE39582	NRC2	stage III	GEO	CINWntUp
GSM972208	0	1	GSE39582	NRC3	stage IV	GEO	CINWntUp
GSM972209	0	1	GSE39582	NRC3	stage IV	GEO	CINWntUp
GSM972210	0	1	GSE39582	NRC1	stage IV	GEO	CSC
GSM972211	1710	0	GSE39582	NRC1	stage III	GEO	CINWntUp
GSM972212	0	1	GSE39582	NRC3	stage IV	GEO	KRASm
GSM972213	0	1	GSE39582	NRC2	stage IV	GEO	CINWntUp
GSM972214	0	1	GSE39582	NRC3	stage IV	GEO	dMMR
GSM972215	1410	0	GSE39582	NRC1	stage III	GEO	CINWntUp
GSM972216	0	1	GSE39582	NRC1	stage IV	GEO	CINImmuneDown
GSM972217	0	1	GSE39582	NRC1	stage IV	GEO	CINWntUp
GSM972218	0	1	GSE39582	NRC2	stage IV	GEO	KRASm
GSM972219	0	1	GSE39582	NRC2	stage IV	GEO	CINWntUp
GSM972220	30	0	GSE39582	NRC2	stage III	GEO	dMMR
GSM972221	1950	0	GSE39582	NRC2	stage II	GEO	dMMR
GSM972222	1710	0	GSE39582	NRC2	stage II	GEO	dMMR
GSM972223	990	0	GSE39582	NRC3	stage II	GEO	dMMR
GSM972224	600	1	GSE39582	NRC2	stage III	GEO	dMMR
GSM972225	1110	0	GSE39582	NRC2	stage II	GEO	dMMR
GSM972226	600	0	GSE39582	NRC2	stage II	GEO	KRASm
GSM972227	600	0	GSE39582	NRC2	stage IV	GEO	KRASm
GSM972228	30	0	GSE39582	NRC2	stage II	GEO	KRASm
GSM972229	0	0	GSE39582	NRC2	stage II	GEO	dMMR
GSM972230	810	0	GSE39582	NRC2	stage III	GEO	CINImmuneDown
GSM972231	420	0	GSE39582	NRC1	stage IV	GEO	CSC
GSM972232	630	0	GSE39582	NRC2	stage IV	GEO	CSC
GSM972233	450	0	GSE39582	NRC2	stage II	GEO	CINWntUp
GSM972234	300	0	GSE39582	NRC3	stage IV	GEO	CSC
GSM972235	210	0	GSE39582	NRC2	stage III	GEO	CINWntUp
GSM972236	360	0	GSE39582	NRC2	stage IV	GEO	CINWntUp
GSM972237	750	0	GSE39582	NRC2	stage I	GEO	CINWntUp
GSM972238	570	0	GSE39582	NRC2	stage III	GEO	CINWntUp
GSM972239	420	0	GSE39582	NRC2	stage II	GEO	CSC
GSM972240	420	0	GSE39582	NRC2	stage IV	GEO	CSC
GSM972241	510	0	GSE39582	NRC2	stage II	GEO	dMMR
GSM972242	510	0	GSE39582	NRC3	stage I	GEO	CINWntUp
GSM972243	60	0	GSE39582	NRC2	stage II	GEO	CINImmuneDown
GSM972244	420	0	GSE39582	NRC1	stage I	GEO	CINnormL
GSM972245	0	0	GSE39582	NRC1	stage IV	GEO	CINImmuneDown
GSM972246	0	0	GSE39582	NRC2	stage III	GEO	CINWntUp
GSM972247	180	0	GSE39582	NRC2	stage II	GEO	CINImmuneDown
GSM972248	420	0	GSE39582	NRC1	stage II	GEO	CINImmuneDown
GSM972249	420	0	GSE39582	NRC2	stage I	GEO	CINImmuneDown
GSM972250	360	0	GSE39582	NRC2	stage III	GEO	CINWntUp
GSM972251	210	0	GSE39582	NRC2	stage IV	GEO	CINWntUp
GSM972252	480	0	GSE39582	NRC2	stage IV	GEO	CINWntUp
GSM972253	480	0	GSE39582	NRC2	stage IV	GEO	CINImmuneDown
GSM972254	270	1	GSE39582	NRC1	stage IV	GEO	CINWntUp
GSM972255	150	0	GSE39582	NRC2	stage II	GEO	CINWntUp
GSM972256	390	1	GSE39582	NRC1	stage IV	GEO	CINImmuneDown
GSM972257	270	1	GSE39582	NRC1	stage II	GEO	CINImmuneDown
GSM972258	0	0	GSE39582	NRC1	stage II	GEO	CINImmuneDown
GSM972259	870	0	GSE39582	NRC1	stage II	GEO	KRASm
GSM972260	390	0	GSE39582	NRC1	stage IV	GEO	CINImmuneDown
GSM972261	210	0	GSE39582	NRC2	stage III	GEO	dMMR
GSM972262	150	0	GSE39582	NRC3	stage II	GEO	CSC
GSM972263	2280	0	GSE39582	NRC2	stage III	GEO	dMMR
GSM972264	2190	0	GSE39582	NRC2	stage II	GEO	dMMR
GSM972265	1800	0	GSE39582	NRC2	stage III	GEO	dMMR
GSM972266	600	0	GSE39582	NRC2	stage IV	GEO	dMMR
GSM972267	2010	0	GSE39582	NRC2	stage II	GEO	CINImmuneDown
GSM972268	1440	0	GSE39582	NRC2	stage III	GEO	KRASm
GSM972269	2370	0	GSE39582	NRC1	stage I	GEO	KRASm
GSM972270	1950	0	GSE39582	NRC2	stage II	GEO	dMMR
GSM972271	390	1	GSE39582	NRC2	stage III	GEO	CINWntUp
GSM972272	450	0	GSE39582	NRC2	stage IV	GEO	CINImmuneDown
GSM972273	480	0	GSE39582	NRC2	NA	NA	KRASm
GSM972274	1710	0	GSE39582	NRC2	stage III	GEO	dMMR
GSM972275	90	1	GSE39582	NRC2	stage II	GEO	CSC
GSM972276	1290	0	GSE39582	NRC2	stage III	GEO	dMMR
GSM972277	1530	0	GSE39582	NRC2	stage II	GEO	dMMR
GSM972278	1350	0	GSE39582	NRC2	stage I	GEO	dMMR
GSM972279	1560	0	GSE39582	NRC2	stage III	GEO	CSC
GSM972280	1380	0	GSE39582	NRC1	stage II	GEO	dMMR
GSM972281	1680	0	GSE39582	NRC2	stage I	GEO	CINWntUp
GSM972282	1530	0	GSE39582	NRC2	stage I	GEO	dMMR
GSM972283	1530	0	GSE39582	NRC2	stage II	GEO	dMMR
GSM972284	810	0	GSE39582	NRC2	stage IV	GEO	CINWntUp
GSM972285	60	0	GSE39582	NRC2	stage II	GEO	dMMR
GSM972286	1110	0	GSE39582	NRC2	stage II	GEO	dMMR
GSM972287	1290	0	GSE39582	NRC2	stage II	GEO	dMMR
GSM972288	1050	0	GSE39582	NRC1	stage IV	GEO	CINWntUp
GSM972289	510	0	GSE39582	NRC2	stage IV	GEO	CINImmuneDown
GSM972290	1170	0	GSE39582	NRC2	stage I	GEO	CINWntUp
GSM972291	300	1	GSE39582	NRC2	stage III	GEO	CSC
GSM972292	750	0	GSE39582	NRC2	stage II	GEO	dMMR
GSM972293	1500	0	GSE39582	NRC2	stage I	GEO	dMMR
GSM972294	750	0	GSE39582	NRC2	stage II	GEO	dMMR
GSM972295	1830	0	GSE39582	NRC2	stage III	GEO	KRASm
GSM972296	660	0	GSE39582	NRC2	NA	NA	KRASm
GSM972297	1380	0	GSE39582	NRC2	stage I	GEO	dMMR
GSM972298	270	0	GSE39582	NRC2	stage II	GEO	dMMR
GSM972299	1230	0	GSE39582	NRC2	stage IV	GEO	CINWntUp
GSM972300	1230	0	GSE39582	NRC3	NA	NA	KRASm
GSM972301	3150	0	GSE39582	NRC3	stage III	GEO	CINnormL
GSM972302	810	0	GSE39582	NRC2	stage III	GEO	CINImmuneDown
GSM972303	570	0	GSE39582	NRC2	stage I	GEO	CINImmuneDown
GSM972304	900	0	GSE39582	NRC2	stage II	GEO	KRASm
GSM972305	930	0	GSE39582	NRC3	stage III	GEO	dMMR
GSM972306	1680	0	GSE39582	NRC2	stage II	GEO	CINImmuneDown
GSM972307	2460	0	GSE39582	NRC2	stage II	GEO	CINImmuneDown
GSM972308	2760	0	GSE39582	NRC2	stage III	GEO	dMMR
GSM972309	2850	0	GSE39582	NRC2	stage II	GEO	CINImmuneDown
GSM972310	750	0	GSE39582	NRC2	stage III	GEO	CINImmuneDown
GSM972311	3180	0	GSE39582	NRC1	stage II	GEO	CINWntUp
GSM972312	2910	0	GSE39582	NRC2	stage II	GEO	CINWntUp
GSM972313	2730	0	GSE39582	NRC2	stage I	GEO	CINWntUp
GSM972314	1380	0	GSE39582	NRC2	stage III	GEO	dMMR
GSM972315	2520	0	GSE39582	NRC2	stage I	GEO	KRASm
GSM972316	2490	0	GSE39582	NRC2	stage II	GEO	dMMR
GSM972317	150	1	GSE39582	NRC2	stage II	GEO	dMMR
GSM972318	1080	0	GSE39582	NRC2	stage II	GEO	CINImmuneDown
GSM972319	2340	0	GSE39582	NRC2	stage II	GEO	CINImmuneDown
GSM972320	300	1	GSE39582	NRC2	stage III	GEO	CINnormL
GSM972321	270	0	GSE39582	NRC2	stage III	GEO	CINnormL
GSM972322	1980	1	GSE39582	NRC2	stage II	GEO	CINImmuneDown
GSM972323	2400	0	GSE39582	NRC2	stage III	GEO	CINWntUp
GSM972324	2460	0	GSE39582	NRC2	stage II	GEO	CINWntUp
GSM972325	1590	1	GSE39582	NRC2	stage III	GEO	KRASm
GSM972326	2550	0	GSE39582	NRC2	stage II	GEO	KRASm
GSM972327	2490	0	GSE39582	NRC3	stage II	GEO	dMMR
GSM972328	2340	1	GSE39582	NRC2	stage III	GEO	CINWntUp
GSM972329	2340	0	GSE39582	NRC2	stage II	GEO	CINnormL
GSM972330	2580	0	GSE39582	NRC3	stage II	GEO	dMMR
GSM972331	2250	0	GSE39582	NRC2	stage II	GEO	CINWntUp
GSM972332	2610	0	GSE39582	NRC2	stage II	GEO	dMMR
GSM972333	2400	0	GSE39582	NRC2	stage II	GEO	CINImmuneDown
GSM972334	2310	0	GSE39582	NRC3	stage III	GEO	dMMR
GSM972335	1380	0	GSE39582	NRC2	stage I	GEO	CINImmuneDown
GSM972336	1500	0	GSE39582	NRC2	stage III	GEO	CINnormL
GSM972337	1230	0	GSE39582	NRC3	stage III	GEO	dMMR
GSM972338	2220	0	GSE39582	NRC2	stage II	GEO	CINnormL
GSM972339	2280	0	GSE39582	NRC2	stage III	GEO	CINImmuneDown
GSM972340	1440	1	GSE39582	NRC2	stage II	GEO	CINWntUp
GSM972341	2070	0	GSE39582	NRC2	stage III	GEO	CINWntUp
GSM972342	840	0	GSE39582	NRC2	stage I	GEO	CINImmuneDown
GSM972343	1560	0	GSE39582	NRC2	stage II	GEO	CINWntUp
GSM972344	2250	0	GSE39582	NRC2	stage II	GEO	CINWntUp
GSM972345	1230	1	GSE39582	NRC3	stage III	GEO	CSC
GSM972346	2160	0	GSE39582	NRC2	stage III	GEO	dMMR
GSM972347	210	0	GSE39582	NRC2	stage II	GEO	CINWntUp
GSM972348	1860	0	GSE39582	NRC2	stage II	GEO	CINImmuneDown
GSM972349	150	0	GSE39582	NRC3	stage III	GEO	CSC
GSM972351	720	0	GSE39582	NRC2	stage II	GEO	CINnormL
GSM972352	2220	1	GSE39582	NRC3	stage III	GEO	CINWntUp
GSM972353	3990	0	GSE39582	NRC3	stage II	GEO	dMMR
GSM972354	690	1	GSE39582	NRC2	stage III	GEO	dMMR
GSM972355	510	1	GSE39582	NRC1	stage II	GEO	CINWntUp
GSM972357	1260	0	GSE39582	NRC1	stage II	GEO	CINnormL
GSM972358	2430	0	GSE39582	NRC2	stage II	GEO	CINWntUp
GSM972359	360	1	GSE39582	NRC3	stage II	GEO	CINnormL
GSM972360	4230	0	GSE39582	NRC2	stage III	GEO	CINWntUp
GSM972361	540	1	GSE39582	NRC3	stage III	GEO	CSC
GSM972362	2940	0	GSE39582	NRC1	stage III	GEO	CINImmuneDown
GSM972363	4200	0	GSE39582	NRC1	stage III	GEO	CINWntUp
GSM972364	3090	0	GSE39582	NRC2	stage III	GEO	KRASm
GSM972365	1410	0	GSE39582	NRC3	stage III	GEO	CSC
GSM972366	420	1	GSE39582	NRC1	stage III	GEO	CINnormL
GSM972367	2850	0	GSE39582	NRC1	stage III	GEO	CSC
GSM972368	2760	0	GSE39582	NRC1	stage III	GEO	CINImmuneDown
GSM972369	540	1	GSE39582	NRC1	stage III	GEO	CINWntUp
GSM972370	960	1	GSE39582	NRC1	stage III	GEO	CINImmuneDown
GSM972371	2430	0	GSE39582	NRC2	stage III	GEO	CINWntUp
GSM972372	990	1	GSE39582	NRC1	stage III	GEO	CINImmuneDown
GSM972373	1110	1	GSE39582	NRC1	stage III	GEO	CINWntUp
GSM972374	2700	0	GSE39582	NRC1	stage III	GEO	CINnormL
GSM972375	3510	0	GSE39582	NRC1	stage III	GEO	CSC
GSM972376	2610	0	GSE39582	NRC1	stage III	GEO	CINWntUp
GSM972377	2460	0	GSE39582	NRC1	stage III	GEO	CINWntUp
GSM972378	2580	0	GSE39582	NRC1	stage III	GEO	CINWntUp
GSM972379	2850	0	GSE39582	NRC1	stage III	GEO	KRASm
GSM972380	180	1	GSE39582	NRC1	stage III	GEO	CSC
GSM972381	810	1	GSE39582	NRC1	stage II	GEO	CINWntUp
GSM972382	1110	1	GSE39582	NRC2	stage II	GEO	CINWntUp
GSM972383	2760	0	GSE39582	NRC1	stage II	GEO	CINnormL
GSM972384	3180	0	GSE39582	NRC2	stage II	GEO	CINWntUp
GSM972385	1890	0	GSE39582	NRC1	stage II	GEO	CSC
GSM972386	2700	0	GSE39582	NRC2	stage II	GEO	CINImmuneDown
GSM972387	720	1	GSE39582	NRC2	stage II	GEO	CINImmuneDown
GSM972388	2490	0	GSE39582	NRC2	stage II	GEO	CINImmuneDown
GSM972389	2790	0	GSE39582	NRC2	stage II	GEO	KRASm
GSM972390	180	1	GSE39582	NRC1	stage III	GEO	KRASm
GSM972391	1290	1	GSE39582	NRC1	stage II	GEO	dMMR
GSM972392	630	1	GSE39582	NRC1	stage II	GEO	CINImmuneDown
GSM972393	150	1	GSE39582	NRC1	stage II	GEO	CINWntUp
GSM972394	180	1	GSE39582	NRC1	stage III	GEO	CINnormL
GSM972395	4410	0	GSE39582	NRC1	stage III	GEO	CINWntUp
GSM972396	3210	0	GSE39582	NRC2	stage II	GEO	KRASm
GSM972397	3150	0	GSE39582	NRC1	stage II	GEO	CINImmuneDown
GSM972398	1920	0	GSE39582	NRC2	stage II	GEO	CINImmuneDown
GSM972399	2700	0	GSE39582	NRC1	stage III	GEO	CINWntUp
GSM972400	240	1	GSE39582	NRC3	stage IV	GEO	CINnormL
GSM972401	0	0	GSE39582	NRC3	stage II	GEO	CSC
GSM972402	0	1	GSE39582	NRC1	stage II	GEO	CINWntUp
GSM972403	1680	0	GSE39582	NRC1	stage II	GEO	dMMR
GSM972404	1440	0	GSE39582	NRC3	stage II	GEO	CINImmuneDown
GSM972405	2370	0	GSE39582	NRC1	stage II	GEO	CINWntUp
GSM972406	3180	0	GSE39582	NRC3	stage II	GEO	dMMR
GSM972407	3960	0	GSE39582	NRC1	stage II	GEO	CINWntUp
GSM972408	960	0	GSE39582	NRC3	stage II	GEO	CINWntUp
GSM972409	3120	0	GSE39582	NRC3	stage II	GEO	CSC
GSM972410	2730	0	GSE39582	NRC1	stage II	GEO	CINWntUp
GSM972411	3750	0	GSE39582	NRC2	stage III	GEO	CINImmuneDown
GSM972412	150	1	GSE39582	NRC2	stage III	GEO	CSC
GSM972413	480	1	GSE39582	NRC3	stage III	GEO	CSC
GSM972414	1590	0	GSE39582	NRC2	stage II	GEO	CINImmuneDown
GSM972415	240	1	GSE39582	NRC2	stage III	GEO	CINImmuneDown
GSM972416	150	1	GSE39582	NRC1	stage II	GEO	CINWntUp
GSM972417	4380	0	GSE39582	NRC1	stage II	GEO	CINWntUp
GSM972418	2100	0	GSE39582	NRC1	stage II	GEO	CINWntUp
GSM972419	900	1	GSE39582	NRC1	stage III	GEO	CINWntUp
GSM972420	180	1	GSE39582	NRC1	stage III	GEO	dMMR
GSM972421	660	1	GSE39582	NRC1	stage III	GEO	CINWntUp
GSM972422	390	1	GSE39582	NRC1	stage II	GEO	CSC
GSM972423	390	1	GSE39582	NRC1	stage II	GEO	CINnormL
GSM972424	3120	0	GSE39582	NRC1	stage II	GEO	CINnormL
GSM972425	1770	0	GSE39582	NRC1	stage III	GEO	dMMR
GSM972426	2430	0	GSE39582	NRC1	stage II	GEO	CINnormL
GSM972427	1590	0	GSE39582	NRC1	stage II	GEO	CINWntUp
GSM972428	1650	0	GSE39582	NRC1	stage III	GEO	CINWntUp
GSM972429	1860	0	GSE39582	NRC1	stage III	GEO	KRASm
GSM972430	1590	0	GSE39582	NRC3	stage II	GEO	dMMR
GSM972431	1620	0	GSE39582	NRC3	stage III	GEO	CINWntUp
GSM972432	570	1	GSE39582	NRC1	stage III	GEO	CINnormL
GSM972433	90	1	GSE39582	NRC3	stage III	GEO	CSC
GSM972434	570	1	GSE39582	NRC2	stage II	GEO	CINImmuneDown
GSM972435	420	1	GSE39582	NRC1	stage III	GEO	CINImmuneDown
GSM972436	60	1	GSE39582	NRC2	stage II	GEO	CINImmuneDown
GSM972437	0	1	GSE39582	NRC3	stage IV	GEO	CINWntUp
GSM972438	0	1	GSE39582	NRC3	stage IV	GEO	CSC
GSM972439	0	1	GSE39582	NRC3	stage IV	GEO	CINnormL
GSM972440	1560	0	GSE39582	NRC3	stage II	GEO	CSC
GSM972441	0	1	GSE39582	NRC1	stage IV	GEO	CINnormL
GSM972442	0	1	GSE39582	NRC3	stage IV	GEO	CINImmuneDown
GSM972443	1440	0	GSE39582	NRC2	stage II	GEO	KRASm
GSM972444	150	1	GSE39582	NRC2	stage III	GEO	CSC
GSM972445	1050	0	GSE39582	NRC2	stage II	GEO	dMMR
GSM972447	930	0	GSE39582	NRC2	stage II	GEO	dMMR
GSM972449	570	1	GSE39582	NRC2	stage III	GEO	CINnormL
GSM972450	570	1	GSE39582	NRC2	stage II	GEO	CINImmuneDown
GSM972451	2910	0	GSE39582	NRC2	stage II	GEO	CINImmuneDown
GSM972452	2970	0	GSE39582	NRC3	stage III	GEO	dMMR
GSM972453	3000	0	GSE39582	NRC2	stage III	GEO	KRASm
GSM972454	2250	0	GSE39582	NRC2	stage I	GEO	CINnormL
GSM972455	2220	0	GSE39582	NRC3	stage III	GEO	dMMR
GSM972456	0	0	GSE39582	NRC2	stage II	GEO	CINWntUp
GSM972457	1020	1	GSE39582	NRC2	stage III	GEO	KRASm
GSM972458	510	0	GSE39582	NRC2	stage II	GEO	dMMR
GSM972459	360	0	GSE39582	NRC2	stage II	GEO	KRASm
GSM972460	2880	0	GSE39582	NRC2	stage II	GEO	CINWntUp
GSM972461	2880	0	GSE39582	NRC2	stage II	GEO	CINImmuneDown
GSM972462	2640	0	GSE39582	NRC2	stage I	GEO	CINWntUp
GSM972464	2580	0	GSE39582	NRC2	stage I	GEO	CINWntUp
GSM972465	2520	0	GSE39582	NRC2	stage II	GEO	dMMR
GSM972466	2250	0	GSE39582	NRC2	stage III	GEO	CINImmuneDown
GSM972467	2160	0	GSE39582	NRC3	stage III	GEO	CSC
GSM972468	720	0	GSE39582	NRC2	stage II	GEO	CINWntUp
GSM972469	2580	0	GSE39582	NRC2	stage I	GEO	CINWntUp
GSM972470	2550	0	GSE39582	NRC3	stage II	GEO	dMMR
GSM972472	2400	0	GSE39582	NRC2	stage II	GEO	KRASm
GSM972473	1350	1	GSE39582	NRC2	stage II	GEO	KRASm
GSM972474	270	1	GSE39582	NRC2	stage III	GEO	CINnormL
GSM972475	2610	0	GSE39582	NRC2	stage II	GEO	KRASm
GSM972476	1920	0	GSE39582	NRC3	stage III	GEO	CSC
GSM972477	2430	0	GSE39582	NRC2	stage II	GEO	KRASm
GSM972478	2070	0	GSE39582	NRC2	stage II	GEO	CINnormL
GSM972479	90	0	GSE39582	NRC3	stage III	GEO	CSC
GSM972480	2070	0	GSE39582	NRC2	stage II	GEO	KRASm
GSM972481	1950	0	GSE39582	NRC1	stage III	GEO	CINWntUp
GSM972482	1260	0	GSE39582	NRC3	stage II	GEO	dMMR
GSM972483	690	1	GSE39582	NRC2	stage II	GEO	CINWntUp
GSM972484	2280	0	GSE39582	NRC2	stage II	GEO	CINWntUp
GSM972485	2250	0	GSE39582	NRC2	stage II	GEO	CINWntUp
GSM972486	990	0	GSE39582	NRC2	stage II	GEO	CINWntUp
GSM972487	2010	0	GSE39582	NRC2	stage II	GEO	KRASm
GSM972488	1470	0	GSE39582	NRC3	stage II	GEO	KRASm
GSM972489	2220	0	GSE39582	NRC2	stage II	GEO	KRASm
GSM972490	2220	0	GSE39582	NRC2	stage II	GEO	CINImmuneDown
GSM972491	2100	0	GSE39582	NRC2	stage II	GEO	CINWntUp
GSM972492	2040	0	GSE39582	NRC2	stage I	GEO	CINWntUp
GSM972493	1770	0	GSE39582	NRC2	stage II	GEO	CINWntUp
GSM972494	1710	0	GSE39582	NRC2	stage I	GEO	dMMR
GSM972495	540	1	GSE39582	NRC2	stage III	GEO	CINWntUp
GSM972496	4260	0	GSE39582	NRC2	stage I	GEO	KRASm
GSM972497	30	0	GSE39582	NRC2	stage III	GEO	CINWntUp
GSM972498	570	1	GSE39582	NRC2	stage III	GEO	CINImmuneDown
GSM972499	2160	0	GSE39582	NRC2	stage III	GEO	dMMR
GSM972501	3180	0	GSE39582	NRC1	stage III	GEO	CINWntUp
GSM972502	3930	0	GSE39582	NRC1	stage II	GEO	KRASm
GSM972503	4380	0	GSE39582	NRC1	stage II	GEO	CINnormL
GSM972504	720	1	GSE39582	NRC1	stage III	GEO	CINImmuneDown
GSM972505	4320	0	GSE39582	NRC1	stage II	GEO	CINImmuneDown
GSM972506	4230	0	GSE39582	NRC1	stage II	GEO	CINnormL
GSM972507	1260	0	GSE39582	NRC2	stage III	GEO	dMMR
GSM972508	4020	0	GSE39582	NRC2	stage I	GEO	CINImmuneDown
GSM972509	420	0	GSE39582	NRC2	stage I	GEO	CINImmuneDown
GSM972510	2580	0	GSE39582	NRC2	stage II	GEO	KRASm
GSM972511	1410	0	GSE39582	NRC2	stage III	GEO	CINWntUp
GSM972512	120	1	GSE39582	NRC2	stage III	GEO	KRASm
GSM972513	390	1	GSE39582	NRC2	stage III	GEO	CINWntUp
GSM972515	3540	0	GSE39582	NRC2	stage II	GEO	CINImmuneDown
GSM972516	1980	0	GSE39582	NRC2	stage II	GEO	CINImmuneDown
GSM972517	960	1	GSE39582	NRC2	stage II	GEO	CINWntUp
GSM972518	450	1	GSE39582	NRC1	stage III	GEO	CINnormL
GSM972519	330	1	GSE39582	NRC1	stage II	GEO	CINnormL
GSM972520	1860	0	GSE39582	NRC3	stage III	GEO	dMMR
GSM972521	2280	0	GSE39582	NRC2	stage II	GEO	CSC
GSM972522	2970	0	GSE39582	NRC3	stage II	GEO	dMMR

## Sheet: GSE37892
Table S1. Basic information of bulk databases (TCGA, GSE33133, GSE14333, GSE39582 and GSE37892)
	RFS (days)	RFS.event	dataset	consensus cluster	Stage	dataset
GSM929508	439	1	GSE37892	NRC1	stage II	GEO
GSM929511	858	1	GSE37892	NRC2	stage III	GEO
GSM929622	78	1	GSE37892	NRC3	stage III	GEO
GSM929546	263	1	GSE37892	NRC2	stage II	GEO
GSM929623	350	1	GSE37892	NRC1	stage III	GEO
GSM929539	383	1	GSE37892	NRC3	stage II	GEO
GSM929614	561	1	GSE37892	NRC3	stage III	GEO
GSM929496	165	1	GSE37892	NRC2	stage III	GEO
GSM929574	645	1	GSE37892	NRC1	stage III	GEO
GSM929590	551	1	GSE37892	NRC1	stage III	GEO
GSM929586	751	1	GSE37892	NRC2	stage II	GEO
GSM929585	841	1	GSE37892	NRC1	stage II	GEO
GSM929612	993	1	GSE37892	NRC1	stage III	GEO
GSM929609	204	1	GSE37892	NRC1	stage III	GEO
GSM929497	209	1	GSE37892	NRC2	stage III	GEO
GSM929593	438	1	GSE37892	NRC3	stage III	GEO
GSM929591	519	1	GSE37892	NRC3	stage II	GEO
GSM929551	1387	1	GSE37892	NRC2	stage II	GEO
GSM929587	1150	1	GSE37892	NRC2	stage II	GEO
GSM929523	301	1	GSE37892	NRC2	stage III	GEO
GSM929519	779	1	GSE37892	NRC2	stage III	GEO
GSM929524	591	1	GSE37892	NRC2	stage III	GEO
GSM929525	111	1	GSE37892	NRC2	stage III	GEO
GSM929599	1015	1	GSE37892	NRC1	stage III	GEO
GSM929617	337	1	GSE37892	NRC3	stage III	GEO
GSM929576	137	1	GSE37892	NRC2	stage III	GEO
GSM929572	366	1	GSE37892	NRC1	stage III	GEO
GSM929499	965	1	GSE37892	NRC3	stage III	GEO
GSM929504	965	1	GSE37892	NRC3	stage III	GEO
GSM929610	1156	1	GSE37892	NRC1	stage III	GEO
GSM929498	1140	1	GSE37892	NRC2	stage III	GEO
GSM929618	608	1	GSE37892	NRC2	stage III	GEO
GSM929575	550	1	GSE37892	NRC3	stage III	GEO
GSM929577	426	1	GSE37892	NRC1	stage III	GEO
GSM929502	199	1	GSE37892	NRC2	stage III	GEO
GSM929503	200	1	GSE37892	NRC3	stage III	GEO
GSM929500	1721	1	GSE37892	NRC2	stage III	GEO
GSM929494	1705	0	GSE37892	NRC2	stage II	GEO
GSM929495	1211	0	GSE37892	NRC2	stage II	GEO
GSM929501	1757	0	GSE37892	NRC3	stage III	GEO
GSM929505	2773	0	GSE37892	NRC1	stage II	GEO
GSM929506	1259	0	GSE37892	NRC2	stage II	GEO
GSM929507	2600	0	GSE37892	NRC1	stage II	GEO
GSM929509	2308	0	GSE37892	NRC1	stage II	GEO
GSM929510	358	0	GSE37892	NRC2	stage II	GEO
GSM929512	982	0	GSE37892	NRC1	stage III	GEO
GSM929513	1259	0	GSE37892	NRC3	stage III	GEO
GSM929514	2168	0	GSE37892	NRC2	stage II	GEO
GSM929515	1941	0	GSE37892	NRC2	stage II	GEO
GSM929516	1695	0	GSE37892	NRC2	stage II	GEO
GSM929517	1399	0	GSE37892	NRC2	stage II	GEO
GSM929518	461	0	GSE37892	NRC2	stage III	GEO
GSM929520	1107	0	GSE37892	NRC2	stage III	GEO
GSM929521	1100	0	GSE37892	NRC2	stage III	GEO
GSM929522	1083	0	GSE37892	NRC2	stage III	GEO
GSM929526	459	0	GSE37892	NRC2	stage III	GEO
GSM929527	775	0	GSE37892	NRC2	stage III	GEO
GSM929528	1621	0	GSE37892	NRC2	stage II	GEO
GSM929529	1096	0	GSE37892	NRC1	stage II	GEO
GSM929530	1240	0	GSE37892	NRC1	stage II	GEO
GSM929531	1355	0	GSE37892	NRC3	stage II	GEO
GSM929532	1348	0	GSE37892	NRC3	stage II	GEO
GSM929533	1369	0	GSE37892	NRC2	stage II	GEO
GSM929534	1390	0	GSE37892	NRC2	stage II	GEO
GSM929535	1326	0	GSE37892	NRC2	stage II	GEO
GSM929536	1736	0	GSE37892	NRC2	stage II	GEO
GSM929537	1349	0	GSE37892	NRC2	stage II	GEO
GSM929538	1285	0	GSE37892	NRC2	stage II	GEO
GSM929540	1948	0	GSE37892	NRC2	stage II	GEO
GSM929541	1700	0	GSE37892	NRC2	stage II	GEO
GSM929542	1553	0	GSE37892	NRC3	stage II	GEO
GSM929543	1282	0	GSE37892	NRC2	stage II	GEO
GSM929544	1006	0	GSE37892	NRC2	stage II	GEO
GSM929545	1323	0	GSE37892	NRC2	stage II	GEO
GSM929547	1456	0	GSE37892	NRC2	stage II	GEO
GSM929548	2429	0	GSE37892	NRC3	stage II	GEO
GSM929549	2654	0	GSE37892	NRC3	stage II	GEO
GSM929550	2124	0	GSE37892	NRC2	stage II	GEO
GSM929552	1444	0	GSE37892	NRC3	stage II	GEO
GSM929553	2274	0	GSE37892	NRC2	stage II	GEO
GSM929554	1878	0	GSE37892	NRC3	stage II	GEO
GSM929555	2059	0	GSE37892	NRC2	stage II	GEO
GSM929556	469	0	GSE37892	NRC2	stage II	GEO
GSM929557	899	0	GSE37892	NRC2	stage II	GEO
GSM929558	1788	0	GSE37892	NRC2	stage II	GEO
GSM929559	17	0	GSE37892	NRC3	stage II	GEO
GSM929560	1032	0	GSE37892	NRC2	stage II	GEO
GSM929561	39	0	GSE37892	NRC2	stage II	GEO
GSM929562	804	0	GSE37892	NRC3	stage II	GEO
GSM929563	816	0	GSE37892	NRC2	stage II	GEO
GSM929564	590	0	GSE37892	NRC3	stage II	GEO
GSM929565	1693	0	GSE37892	NRC2	stage II	GEO
GSM929566	1834	0	GSE37892	NRC2	stage II	GEO
GSM929567	1522	0	GSE37892	NRC2	stage II	GEO
GSM929568	1545	0	GSE37892	NRC2	stage II	GEO
GSM929569	2101	0	GSE37892	NRC1	stage II	GEO
GSM929570	1210	0	GSE37892	NRC2	stage II	GEO
GSM929571	1534	0	GSE37892	NRC2	stage II	GEO
GSM929573	1430	0	GSE37892	NRC3	stage III	GEO
GSM929578	999	0	GSE37892	NRC3	stage III	GEO
GSM929579	1685	0	GSE37892	NRC2	stage II	GEO
GSM929580	1663	0	GSE37892	NRC2	stage II	GEO
GSM929581	1680	0	GSE37892	NRC2	stage II	GEO
GSM929582	1939	0	GSE37892	NRC1	stage II	GEO
GSM929583	1771	0	GSE37892	NRC2	stage II	GEO
GSM929584	1779	0	GSE37892	NRC1	stage II	GEO
GSM929588	2155	0	GSE37892	NRC2	stage II	GEO
GSM929589	1904	0	GSE37892	NRC2	stage III	GEO
GSM929592	1432	0	GSE37892	NRC3	stage III	GEO
GSM929594	1820	0	GSE37892	NRC1	stage III	GEO
GSM929595	1804	0	GSE37892	NRC2	stage III	GEO
GSM929596	3137	0	GSE37892	NRC1	stage III	GEO
GSM929597	1787	0	GSE37892	NRC1	stage III	GEO
GSM929598	1668	0	GSE37892	NRC1	stage III	GEO
GSM929600	2163	0	GSE37892	NRC1	stage III	GEO
GSM929601	1853	0	GSE37892	NRC1	stage III	GEO
GSM929602	1096	0	GSE37892	NRC2	stage II	GEO
GSM929603	1496	0	GSE37892	NRC1	stage III	GEO
GSM929604	2818	0	GSE37892	NRC2	stage III	GEO
GSM929605	1407	0	GSE37892	NRC2	stage III	GEO
GSM929606	1099	0	GSE37892	NRC1	stage III	GEO
GSM929607	2864	0	GSE37892	NRC1	stage III	GEO
GSM929608	1149	0	GSE37892	NRC2	stage III	GEO
GSM929611	1327	0	GSE37892	NRC1	stage III	GEO
GSM929613	1416	0	GSE37892	NRC2	stage II	GEO
GSM929615	2135	0	GSE37892	NRC2	stage III	GEO
GSM929616	160	0	GSE37892	NRC1	stage II	GEO
GSM929619	1887	0	GSE37892	NRC2	stage II	GEO
GSM929620	2624	0	GSE37892	NRC3	stage II	GEO
GSM929621	2860	0	GSE37892	NRC1	stage II	GEO
